# Supplementary material for: Simple and efficient synthesis of bicyclic enol-carbamates: access to brabantamides and their analogues
Source: RSC Adv. 2020 Feb 13;10(12):6790–3. doi: 10.1039/d0ra00796j (PMC9049743; doi:10.1039/d0ra00796j)
Supplement: RA-010-D0RA00796J-s001 [file RA-010-D0RA00796J-s001.pdf]

## Supporting Information

### Simple and efficient synthesis of bicyclic enol-carbamates: Access to brabantamides and their analogues

Ondrej Záborský,<sup>\*,†</sup> Ľudmila Petrovičová,<sup>†</sup> Jana Doháňošová,<sup>‡</sup> Ján Moncol,<sup>§</sup> and Róbert Fischer<sup>†</sup>

<sup>†</sup>Institute of Organic Chemistry, Catalysis and Petrochemistry, Slovak University of Technology in Bratislava, Radlinského 9, 81237, Bratislava, Slovak Republic

<sup>‡</sup>Central Laboratories, Slovak University of Technology in Bratislava, Radlinského 9, 81237, Bratislava, Slovak Republic

<sup>§</sup>Institute of Inorganic Chemistry, Technology and Materials, Slovak University of Technology in Bratislava, Radlinského 9, 81237, Bratislava, Slovak Republic

#### Table of Contents

|                                                                                        |         |
|----------------------------------------------------------------------------------------|---------|
| 1. General Information                                                                 | S2      |
| 2. General Procedures and Characterization of the Synthesized Compounds                | S2–S7   |
| 3. <sup>1</sup> H, <sup>13</sup> C, COSY and HSQC Spectra of the Synthesized Compounds | S8–S23  |
| 4. X-Ray Structure Analyses of Compounds <b>16a</b> , <b>20</b> and <b>21</b>          | S24–S25 |
| 5. References and Notes                                                                | S26     |

**General Information:** Flash column chromatography (FCC) was carried out with a Büchi system (Pump Manager C-615 and Fraction Collector C-660) using Normasil 60 silica gel (0.040–0.063 mm; VWR). Thin Layer Chromatography (TLC) analysis was carried out using TLC Silica gel 60 F<sub>254</sub> (aluminium sheets, Merck), and plates were visualized with UV light or by treatment with permanganate solution followed by heating. Optical rotations were measured with a JASCO P-2000 digital polarimeter with a Na-D lamp (10 cm cell length). Concentrations (*c*) are given in grams per 100 mL. Melting points were measured with a Melting Point B-540 apparatus (Büchi). Infrared (IR) spectra were recorded as neat samples with a Nicolet 5700 FTIR spectrometer with an ATR Smart Orbit Diamond adapter (Thermo Electron Corporation). NMR spectra were recorded with a Varian VNMRS-600 instrument (<sup>1</sup>H, 599.75 MHz, and <sup>13</sup>C, 150.81 MHz) in CDCl<sub>3</sub> (using tetramethylsilane as the internal standard). Data are presented as follows: chemical shift, multiplicity (s = singlet, bs = broad singlet, d = doublet, t = triplet, q = quartet, dd = doublet of doublets, dq = doublet of quartets, ddd = doublet of doublet of doublets, dddd = doublet of doublet of doublet of doublets, dtd = doublet of triplet of doublets, td = triplet of doublets, dt = doublet of triplets, m = multiplet), coupling constants (*J*/Hz) and integration. <sup>1</sup>H and <sup>13</sup>C signals were assigned by 2D experiments (COSY, HSQC and HMBC). HRMS analyses were carried out with an Orbitrap Velos Pro spectrometer (Thermo Fisher Scientific). All solvents used were dried and distilled according to conventional methods. *N*-Boc-L-proline and *N*-Boc-D-proline were commercially available.

### Preparation of $\beta$ -Ketoester **15**:<sup>1</sup>

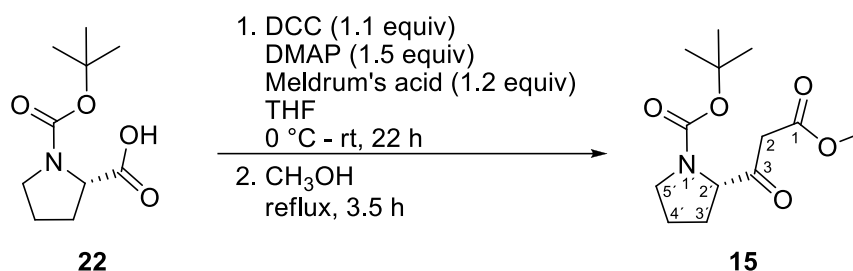

*N*-Boc-L-proline (**22**) (1.5 g, 7.0 mmol, 1 equiv) was dissolved in anhydrous THF (18 mL), the reaction mixture was cooled to 0 °C (ice bath) and DCC (1.57 g, 7.7 mmol, 1.1 equiv) was added. After stirring for 2 min, DMAP (1.28 g, 10.5 mmol, 1.5 equiv) and Meldrum's acid (1.21 g, 8.4 mmol, 1.2 equiv) were added. The reaction mixture was stirred for 22 h with a gradual warming to a room temperature. After this time, the suspension was filtered and the filtrate was concentrated under reduced pressure. The residue was dissolved in CH<sub>2</sub>Cl<sub>2</sub> (50 mL), washed with 1 M HCl (2×10 mL) and finally with water (1×20 mL). The organic layer was dried over anhydrous MgSO<sub>4</sub>, filtered and the solvent was evaporated under reduced pressure. The Meldrum's acid intermediate as a yellow foam was dissolved in MeOH (30 mL) and the reaction mixture was stirred under reflux for 3.5 hours. Then the reaction mixture was concentrated under reduced pressure and the product was isolated by FCC (hexanes/EtOAc, 85:15) to give  $\beta$ -ketoester **15** as a colourless oil in 79% yield (1.5 g, 5.5 mmol).

### (–)-Methyl (2'*S*)-3-(*N*-tert-butoxycarbonyl-2'-pyrrolidinyl)-3-oxopropanoate (**15**):

*R*<sub>f</sub> (*n*-hexane:EtOAc, 1:1) = 0.36. [ $\alpha$ ]<sub>D</sub><sup>25</sup> = –69.4 (*c* 0.99, acetone).

<sup>1</sup>H NMR (600 MHz, CDCl<sub>3</sub>) mixture of rotamers (57:43),  $\delta$ /ppm (major): 4.28 (dd, *J* = 8.5, 5.8 Hz, 1H, H-2'), 3.75 (s, 3H, OCH<sub>3</sub>), 3.60–3.54 (m, 1H, H-5'), 3.52 (d, *J* = 16.0 Hz, 1H, H-2), 3.50 (d, *J* = 16.1 Hz, 1H, H-2), 3.50–3.45 (m, 1H, H-5'), 2.25–2.19 (m, 1H, H-3'), 2.00–1.95 (m, 1H, H-3'), 1.95–1.83 (m, 2H, H-4'), 1.43 (s, 9H, C(CH<sub>3</sub>)<sub>3</sub>);  $\delta$ /ppm (minor): 4.39 (dd, *J* = 8.3, 4.9 Hz, 1H, H-2'), 3.73 (s, 3H, OCH<sub>3</sub>), 3.62 (d, *J* = 15.8 Hz, 1H, H-2), 3.57 (d, *J* = 15.7 Hz, 1H, H-2), 3.45–3.40 (m, 2H, H-5'), 2.15–2.08 (m, 1H, H-3'), 2.07–2.01 (m, 1H, H-3'), 1.95–1.83 (m, 2H, H-4'), 1.47 (s, 9H, C(CH<sub>3</sub>)<sub>3</sub>).

<sup>13</sup>C NMR (150 MHz, CDCl<sub>3</sub>) mixture of rotamers,  $\delta$ /ppm (major): 202.7 (C-3), 167.5 (C-1), 153.9 (CO), 80.9 (C(CH<sub>3</sub>)<sub>3</sub>), 65.7 (C-2'), 52.5 (OCH<sub>3</sub>), 46.9 (C-5'), 45.1 (C-2), 29.9 (C-3'), 28.3 (C(CH<sub>3</sub>)<sub>3</sub>),

23.9 (C-4');  $\delta$ /ppm (minor): 203.1 (C-3), 167.8 (C-1), 154.9 (CO), 80.3 ( $\underline{\text{C}}(\text{CH}_3)_3$ ), 65.2 (C-2'), 52.4 ( $\text{OCH}_3$ ), 47.1 (C-5'), 46.2 (C-2), 28.7 (C-3'), 28.5 ( $\text{C}(\underline{\text{CH}}_3)_3$ ), 24.6 (C-4').

### Cyclization of $\beta$ -Ketoester **15**:

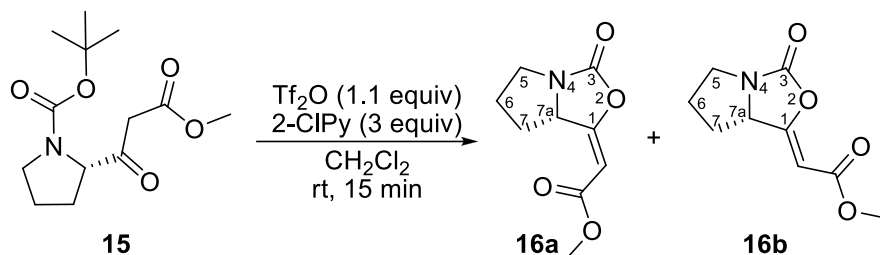

To a stirred solution of  $\beta$ -ketoester **15** (1.043 g, 3.84 mmol, 1 equiv) in anhydrous  $\text{CH}_2\text{Cl}_2$  (38 mL) was added 2-chloropyridine (1.09 mL, 11.52 mmol, 3 equiv) at room temperature under Ar atmosphere, followed by trifluoromethanesulfonic anhydride (0.71 mL, 4.22 mmol, 1.1 equiv). The reaction progress was monitored by TLC ( $\text{CH}_2\text{Cl}_2$ :EtOAc, 7:3) and after the consumption of the starting material (15 minutes), the reaction mixture was filtered through the pad of silica gel ( $\text{CH}_2\text{Cl}_2$ :EtOAc, 9:1 as the eluent). The filtrate was concentrated under reduced pressure and the excess of 2-chloropyridine was removed by using Kugelrohr distillation (50 °C, <1 Torr). The residue was purified by FCC ( $\text{CH}_2\text{Cl}_2$ :EtOAc, 95:5) to give two pure isomers *E*-**16a** and *Z*-**16b** in total yield of 81% (615 mg, 3.12 mmol) with the ratio of **16a**:**16b** 85:15.

#### (–)-(S, *E*)-Methyl 2-(3-oxotetrahydropyrrolo[1,2-*c*]oxazol-1(3*H*)-ylidene)acetate (**16a**):

Yield: 69% (524 mg, 2.66 mmol). Colourless solid.  $R_f$  ( $\text{CH}_2\text{Cl}_2$ :EtOAc, 7:3) = 0.60.  $mp$  = 48–50 °C.  $[\alpha]_D^{22} = -261.1$  ( $c$  1.01, methanol).

$^1\text{H}$  NMR (600 MHz,  $\text{CDCl}_3$ )  $\delta$ /ppm: 5.67 (d,  $J$  = 2.1 Hz, 1H, C=CH), 4.92 (ddd,  $J$  = 9.4, 6.7, 2.0 Hz, 1H, H-7a), 3.73 (s, 3H,  $\text{OCH}_3$ ), 3.69 (dt,  $J$  = 11.4, 7.9 Hz, 1H, H-5), 3.30 (ddd,  $J$  = 11.4, 8.9, 4.6 Hz, 1H, H-5), 2.63 (dddd,  $J$  = 12.7, 7.2, 6.8, 3.2 Hz, 1H, H-7), 2.17–2.04 (m, 2H, H-6), 1.60 (dddd,  $J$  = 12.7, 9.7, 9.4, 9.0 Hz, 1H, H-7).

$^{13}\text{C}$  NMR (150 MHz,  $\text{CDCl}_3$ )  $\delta$ /ppm: 166.7 (CO), 165.8 (C-1), 156.8 (C-3), 95.4 ( $\text{C}=\underline{\text{CH}}$ ), 64.3 (C-7a), 51.6 ( $\text{OCH}_3$ ), 46.1 (C-5), 30.4 (C-7), 26.4 (C-6).

#### (–)-(S, *Z*)-Methyl 2-(3-oxotetrahydropyrrolo[1,2-*c*]oxazol-1(3*H*)-ylidene)acetate (**16b**):

Yield: 12% (91 mg, 0.46 mmol). Colourless solid.  $R_f$  ( $\text{CH}_2\text{Cl}_2$ :EtOAc, 7:3) = 0.45.  $mp$  = 60–62 °C.  $[\alpha]_D^{25} = -73.2$  ( $c$  1.01, methanol). **HRMS (ESI)**:  $m/z$  calcd. for  $\text{C}_9\text{H}_{12}\text{NO}_4$   $[\text{M}+\text{H}]^+$ : 198.0760, found: 198.0761. **IR** (ATR):  $\nu$  = 1789, 1716, 1676, 1378, 1197, 1173, 1142, 1008, 967, 822, 764  $\text{cm}^{-1}$ .

$^1\text{H}$  NMR (600 MHz,  $\text{CDCl}_3$ )  $\delta$ /ppm: 5.15 (d,  $J$  = 1.6 Hz, 1H, C=CH), 4.48 (ddd,  $J$  = 9.2, 6.9, 1.5 Hz, 1H, H-7a), 3.75 (s, 3H,  $\text{OCH}_3$ ), 3.68 (dt,  $J$  = 11.3, 7.8 Hz, 1H, H-5), 3.31 (ddd,  $J$  = 11.3, 8.9, 4.4 Hz, 1H, H-5), 2.25 (dddd,  $J$  = 12.4, 7.2, 6.9, 3.2 Hz, 1H, H-7), 2.20–2.13 (m, 1H, H-6), 2.12–2.03 (m, 1H, H-6), 1.72 (dddd,  $J$  = 12.4, 9.8, 9.2, 8.5 Hz, 1H, H-7).

$^{13}\text{C}$  NMR (150 MHz,  $\text{CDCl}_3$ )  $\delta$ /ppm: 164.2 (CO), 160.8 (C-1), 157.2 (C-3), 94.3 ( $\text{C}=\underline{\text{CH}}$ ), 63.7 (C-7a), 51.7 ( $\text{OCH}_3$ ), 46.2 (C-5), 31.5 (C-7), 26.5 (C-6).

## Preparation of $\beta$ -Ketoester 18:

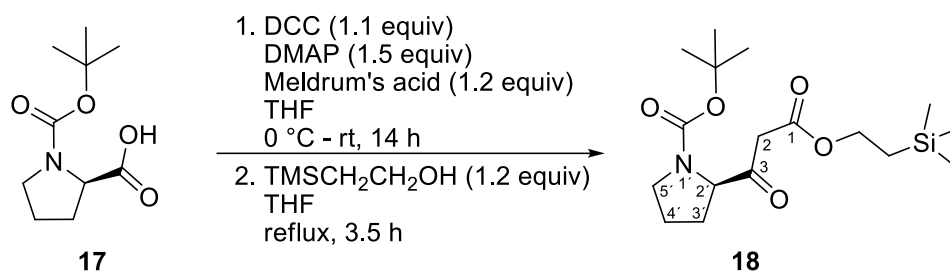

*N*-Boc-D-proline (**17**) (1.9 g, 8.8 mmol, 1 equiv) was dissolved in anhydrous THF (23 mL), the solution was cooled to 0 °C (ice bath) and DCC (2.0 g, 9.7 mmol, 1.1 equiv) was added. After stirring for 2 min, DMAP (1.6 g, 13.2 mmol, 1.5 equiv) and Meldrum's acid (1.5 g, 10.6 mmol, 1.2 equiv) were added. The reaction mixture was stirred for 14 h with a gradual warming to a room temperature. After this time, the suspension was filtered and the filtrate was concentrated under reduced pressure. The residue mixture was dissolved in CH<sub>2</sub>Cl<sub>2</sub> (50 mL), washed with 1 M HCl (2×15 mL) and finally with water (1×30 mL). The organic layer was dried over anhydrous MgSO<sub>4</sub>, filtered and the solvent was evaporated under reduced pressure. The Meldrum's acid intermediate as a yellow foam was dissolved in THF (24 mL), 2-(trimethylsilyl)ethanol (1.52 mL, 10.6 mmol, 1.2 equiv) was added and the reaction mixture was stirred under reflux for 3.5 hours. Then the reaction mixture was concentrated under reduced pressure and the product was isolated by FCC (hexanes:EtOAc, 90:10) to give  $\beta$ -ketoester **18** as a colourless oil in 70% yield (2.2 g, 6.2 mmol).

### (+)-2-(Trimethylsilyl)ethyl (2'*R*)-3-(*N*-*tert*-butoxycarbonyl-2'-pyrrolidinyl)-3-oxopropanoate (**18**):

**R<sub>f</sub>** (*n*-hexane:EtOAc, 1:1) = 0.52. **[ $\alpha$ ]<sub>D</sub><sup>25</sup>** = +55.0 (*c* 1.10, acetone). **HRMS (ESI)**: *m/z* calcd. for C<sub>17</sub>H<sub>32</sub>NO<sub>5</sub>Si [*M*+*H*]<sup>+</sup>: 358.2049, found: 358.2042. **IR** (ATR):  $\nu$  = 1746, 1694, 1390, 1366, 1249, 1161, 1115, 856, 835, 770 cm<sup>-1</sup>.

**<sup>1</sup>H NMR** (600 MHz, CDCl<sub>3</sub>) mixture of rotamers (59:41),  $\delta$ /ppm (major): 4.28 (dd, *J* = 8.4, 5.8 Hz, 1H, H-2'), 4.25–4.20 (m, 2H, OCH<sub>2</sub>), 3.60–3.53 (m, 1H, H-5'), 3.52–3.45 (m, 3H, H-2, H-5'), 2.25–2.18 (m, 1H, H-3'), 2.01–1.95 (m, 1H, H-3'), 1.95–1.82 (m, 2H, H-4'), 1.44 (s, 9H, C(CH<sub>3</sub>)<sub>3</sub>), 1.04–0.99 (m, 2H, SiCH<sub>2</sub>), 0.04 (s, 9H, Si(CH<sub>3</sub>)<sub>3</sub>);  $\delta$ /ppm (minor): 4.39 (dd, *J* = 8.3, 4.9 Hz, 1H, H-2'), 4.24–4.19 (m, 2H, OCH<sub>2</sub>), 3.60–3.53 (m, 2H, H-2), 3.43 (t, *J* = 6.9 Hz, 2H, H-5'), 2.14–2.07 (m, 1H, H-3'), 2.07–2.01 (m, 1H, H-3'), 1.95–1.82 (m, 2H, H-4'), 1.46 (s, 9H, C(CH<sub>3</sub>)<sub>3</sub>), 1.04–0.99 (m, 2H, SiCH<sub>2</sub>), 0.04 (s, 9H, Si(CH<sub>3</sub>)<sub>3</sub>).

**<sup>13</sup>C NMR** (150 MHz, CDCl<sub>3</sub>) mixture of rotamers,  $\delta$ /ppm (major): 202.9 (C-3), 167.3 (C-1), 153.9 (CO), 80.8 (C(CH<sub>3</sub>)<sub>3</sub>), 65.7 (C-2'), 63.9 (OCH<sub>2</sub>), 46.9 (C-5'), 45.6 (C-2), 29.9 (C-3'), 28.4 (C(CH<sub>3</sub>)<sub>3</sub>), 23.9 (C-4'), 17.4 (SiCH<sub>2</sub>), -1.4 (Si(CH<sub>3</sub>)<sub>3</sub>);  $\delta$ /ppm (minor): 203.2 (C-3), 167.6 (C-1), 154.9 (CO), 80.3 (C(CH<sub>3</sub>)<sub>3</sub>), 65.2 (C-2'), 63.7 (OCH<sub>2</sub>), 47.1 (C-5'), 46.7 (C-2), 28.7 (C-3'), 28.5 (C(CH<sub>3</sub>)<sub>3</sub>), 24.6 (C-4'), 17.4 (SiCH<sub>2</sub>), -1.4 (Si(CH<sub>3</sub>)<sub>3</sub>).

## Cyclization of $\beta$ -Ketoester **18**:

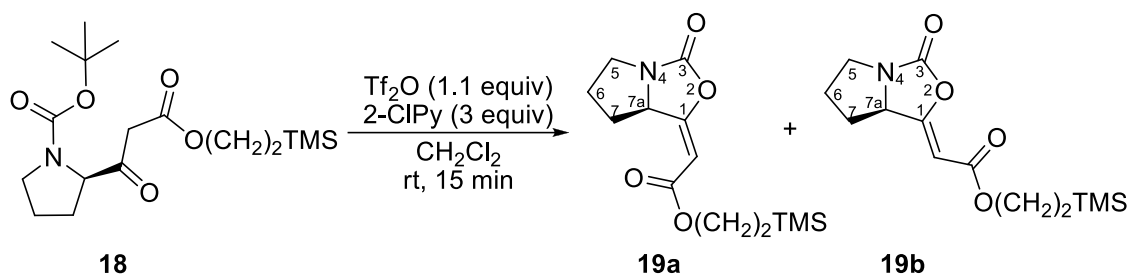

To a stirred solution of  $\beta$ -ketoester **18** (1.213 g, 3.4 mmol, 1 equiv) in anhydrous  $\text{CH}_2\text{Cl}_2$  (34 mL) was added 2-chloropyridine (1 mL, 10.2 mmol, 3 equiv) at room temperature under Ar atmosphere, followed by trifluoromethanesulfonic anhydride (0.63 mL, 3.74 mmol, 1.1 equiv). The reaction progress was monitored by TLC ( $\text{CH}_2\text{Cl}_2$ :EtOAc, 7:3) and after the consumption of the starting material (15 minutes), the reaction mixture was filtered through the pad of silica gel ( $\text{CH}_2\text{Cl}_2$ :EtOAc, 9:1 as the eluent). The filtrate was concentrated under reduced pressure and the excess of 2-chloropyridine was removed by using Kugelrohr distillation (50 °C, <1 Torr). The residue was purified by FCC ( $\text{CH}_2\text{Cl}_2$  to  $\text{CH}_2\text{Cl}_2$ :EtOAc, 95:5)<sup>2</sup> to give two pure isomers *E*-**19a** and *Z*-**19b** in total yield of 76% (729 mg, 2.57 mmol) with the ratio of **19a**:**19b** 89:11.

### (+)-(R, E)-2-(Trimethylsilyl)ethyl 2-(3-oxotetrahydropyrrolo[1,2-c]oxazol-1(3H)-ylidene)acetate (**19a**):

Yield: 67% (650 mg, 2.29 mmol). Colourless solid.  $R_f$  ( $\text{CH}_2\text{Cl}_2$ :EtOAc, 7:3) = 0.67.  $\text{mp} = 36\text{--}38$  °C.  $[\alpha]_D^{22} = +191.9$  (*c* 0.90, methanol).

<sup>1</sup>H NMR (600 MHz,  $\text{CDCl}_3$ )  $\delta$ /ppm: 5.64 (d,  $J = 2.0$  Hz, 1H, C=CH), 4.91 (ddd,  $J = 9.4, 6.6, 2.0$  Hz, 1H, H-7a), 4.26–4.18 (m, 2H, OCH<sub>2</sub>), 3.69 (dt,  $J = 11.4, 7.9$  Hz, 1H, H-5), 3.30 (ddd,  $J = 11.4, 8.9, 4.6$  Hz, 1H, H-5), 2.63 (dddd,  $J = 12.7, 7.2, 6.7, 3.2$  Hz, 1H, H-7), 2.16–2.03 (m, 2H, H-6), 1.60 (dddd,  $J = 12.7, 9.7, 9.5, 9.1$  Hz, 1H, H-7), 1.05–0.99 (m, 2H, SiCH<sub>2</sub>), 0.05 (s, 9H, Si(CH<sub>3</sub>)<sub>3</sub>).

<sup>13</sup>C NMR (150 MHz,  $\text{CDCl}_3$ )  $\delta$ /ppm: 166.5 (CO), 165.5 (C-1), 156.9 (C-3), 96.0 (C=CH), 64.3 (C-7a), 62.7 (OCH<sub>2</sub>), 46.1 (C-5), 30.5 (C-7), 26.4 (C-6), 17.5 (SiCH<sub>2</sub>), -1.4 (Si(CH<sub>3</sub>)<sub>3</sub>).

### (+)-(R, Z)-2-(Trimethylsilyl)ethyl 2-(3-oxotetrahydropyrrolo[1,2-c]oxazol-1(3H)-ylidene)acetate (**19b**):

Yield: 9% (79 mg, 0.28 mmol). Colourless solid.  $R_f$  ( $\text{CH}_2\text{Cl}_2$ :EtOAc, 7:3) = 0.53.  $\text{mp} = 69\text{--}71$  °C.  $[\alpha]_D^{25} = +53.3$  (*c* 1.01, methanol). HRMS (ESI):  $m/z$  calcd. for  $\text{C}_{13}\text{H}_{22}\text{NO}_4\text{Si}$   $[\text{M}+\text{H}]^+$ : 284.1318, found: 284.1313. IR (ATR):  $\nu = 1789, 1711, 1680, 1388, 1249, 1176, 1141, 1000, 828, 763$   $\text{cm}^{-1}$ .

<sup>1</sup>H NMR (600 MHz,  $\text{CDCl}_3$ )  $\delta$ /ppm: 5.12 (d,  $J = 1.6$  Hz, 1H, C=CH), 4.46 (ddd,  $J = 9.2, 6.9, 1.5$  Hz, 1H, H-7a), 4.27–4.23 (m, 2H, OCH<sub>2</sub>), 3.68 (dt,  $J = 11.3, 7.8$  Hz, 1H, H-5), 3.30 (ddd,  $J = 11.3, 8.9, 4.4$  Hz, 1H, H-5), 2.23 (dddd,  $J = 12.4, 7.1, 6.9, 3.2$  Hz, 1H, H-7), 2.19–2.12 (m, 1H, H-6), 2.10–2.01 (m, 1H, H-6), 1.71 (dddd,  $J = 12.4, 9.7, 9.2, 8.6$  Hz, 1H, H-7), 1.07–1.02 (m, 2H, SiCH<sub>2</sub>), 0.05 (s, 9H, Si(CH<sub>3</sub>)<sub>3</sub>).

<sup>13</sup>C NMR (150 MHz,  $\text{CDCl}_3$ )  $\delta$ /ppm: 164.0 (CO), 160.4 (C-1), 157.3 (C-3), 94.9 (C=CH), 63.7 (C-7a), 62.8 (OCH<sub>2</sub>), 46.2 (C-5), 31.6 (C-7), 26.5 (C-6), 17.5 (SiCH<sub>2</sub>), -1.4 (Si(CH<sub>3</sub>)<sub>3</sub>).

## Deesterification of Bicyclic Enol-Carbamate **19a**:

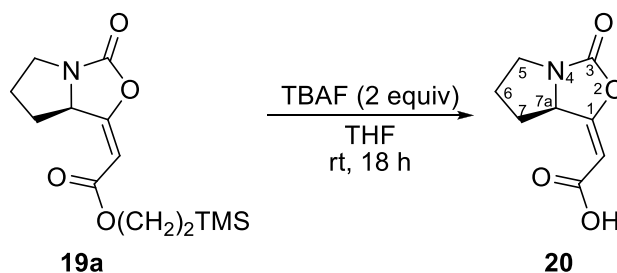

To a stirred solution of bicyclic enol-carbamate **19a** (650 mg, 2.30 mmol, 1 equiv) in anhydrous THF (9.2 mL) was added a solution of TBAF (1 M in THF, 4.6 mL, 4.6 mmol, 2 equiv) at room temperature under Ar atmosphere, and stirring was continued for 18 h. When TLC showed that the reaction was complete ( $\text{CH}_2\text{Cl}_2$ :EtOAc, 7:3), the reaction mixture was diluted with water (10 mL), acidified with 1 M HCl to pH = 3 and extracted with EtOAc ( $3 \times 20$  mL). The combined organic layers were dried over  $\text{MgSO}_4$ , filtered and concentrated under reduced pressure. The product was isolated by FCC ( $\text{CH}_2\text{Cl}_2$  to  $\text{CH}_2\text{Cl}_2$ :MeOH:AcOH, 97:2.7:0.3)<sup>3</sup> to give acid **20** as a colourless solid in 89% yield (373 mg, 2.04 mmol).

### (+)-(R, E)-2-(3-Oxotetrahydropyrrolo[1,2-c]oxazol-1(3H)-ylidene)acetic acid (**20**):

**R<sub>f</sub>** ( $\text{CH}_2\text{Cl}_2$ :MeOH:AcOH, 97:2.7:0.3) = 0.15. **mp** = decomp. >150 °C.  $[\alpha]_{\text{D}}^{25} = +167.6$  (*c* 1.00, methanol). **HRMS (ESI)**: *m/z* calcd. for  $\text{C}_8\text{H}_{10}\text{NO}_4$   $[\text{M}+\text{H}]^+$ : 184.0610, found: 184.0607. **IR (ATR)**:  $\nu = 2905, 1794, 1637, 1154, 1028, 961, 885, 857, 750, 743 \text{ cm}^{-1}$ .

**<sup>1</sup>H NMR** (600 MHz,  $\text{CDCl}_3$ )  $\delta$ /ppm: 10.61 (bs, 1H, COOH), 5.67 (d, *J* = 1.9 Hz, 1H, C=CH), 4.93 (ddd, *J* = 9.5, 6.7, 1.9 Hz, 1H, H-7a), 3.70 (dt, *J* = 11.4, 7.9 Hz, 1H, H-5), 3.31 (ddd, *J* = 11.4, 8.9, 4.5 Hz, 1H, H-5), 2.61 (dddd, *J* = 12.7, 7.0, 6.8, 3.1 Hz, 1H, H-7), 2.19–2.05 (m, 2H, H-6), 1.63 (dddd, *J* = 12.7, 9.9, 9.5, 9.5 Hz, 1H, H-7).

**<sup>13</sup>C NMR** (150 MHz,  $\text{CDCl}_3$ )  $\delta$ /ppm: 171.9, 168.0 (COOH, C-1), 156.5 (C-3), 95.3 (C=CH), 64.5 (C-7a), 46.1 (C-5), 30.3 (C-7), 26.4 (C-6).

## Synthesis of Amide **21**:

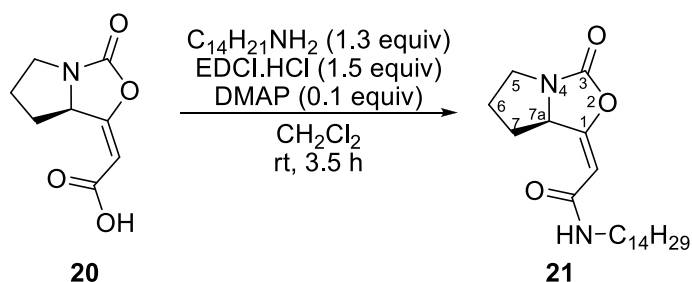

To a stirred solution of acid **20** (100 mg, 0.55 mmol, 1 equiv) in anhydrous  $\text{CH}_2\text{Cl}_2$  (1.8 mL) were added EDCI.HCl (158 mg, 0.825 mmol, 1.5 equiv) and DMAP (6.7 mg, 0.055 mmol, 0.1 equiv) at room temperature under Ar atmosphere, and stirring was continued for 15 min. After this time, tetradecylamine (153 mg, 0.715 mmol, 1.3 equiv) was added and the reaction mixture was stirred for additional 3.5 h. When TLC showed that the reaction was complete ( $\text{CH}_2\text{Cl}_2$ :EtOAc, 7:3), it was quenched by the addition of 1 M HCl (3 mL) and the reaction mixture was extracted with EtOAc ( $3 \times 10$  mL). The combined organic layers were dried over  $\text{MgSO}_4$ , filtered and concentrated under reduced pressure. The residue was purified by FCC (hexanes:EtOAc, 75:25) to give amide **21** as a colourless solid in 40% yield (82 mg, 0.22 mmol).

**(+)-(R, E)-2-(3-Oxotetrahydropyrrolo[1,2-*c*]oxazol-1(3*H*)-ylidene)-*N*-tetradecylacetamide (21):**

**R<sub>f</sub>** (*n*-hexane:EtOAc, 1:1) = 0.34. **mp** = 66–68 °C. **[α]<sub>D</sub><sup>25</sup>** = +141.0 (*c* 1.01, chloroform). **HRMS (ESI):** *m/z* calcd. for C<sub>22</sub>H<sub>39</sub>N<sub>2</sub>O<sub>3</sub> [M+H]<sup>+</sup>: 379.2961, found: 379.2960. **IR (ATR):** ν = 3292, 2918, 2850, 1797, 1682, 1614, 1541, 1470, 1160, 1035, 965 cm<sup>-1</sup>.

**<sup>1</sup>H NMR** (600 MHz, CDCl<sub>3</sub>) δ/ppm: 5.69 (t, *J* = 5.4 Hz, 1H, NH), 5.57 (d, *J* = 2.0 Hz, 1H, C=CH), 4.99 (ddd, *J* = 9.5, 6.6, 2.0 Hz, 1H, H-7a), 3.66 (dt, *J* = 11.3, 7.9 Hz, 1H, H-5), 3.33–3.21 (m, 3H, H-5, CH<sub>2</sub>NH), 2.68 (dddd, *J* = 12.7, 7.0, 6.7, 3.1 Hz, 1H, H-7), 2.13–2.00 (m, 2H, H-6), 1.59 (dddd, *J* = 12.7, 9.7, 9.5, 9.1 Hz, 1H, H-7), 1.55–1.49 (m, 2H, CH<sub>2</sub>CH<sub>2</sub>NH), 1.34–1.22 (m, 22H, C<sub>11</sub>H<sub>22</sub>CH<sub>3</sub>), 0.88 (t, *J* = 7.2 Hz, 3H, CH<sub>3</sub>).

**<sup>13</sup>C NMR** (150 MHz, CDCl<sub>3</sub>) δ/ppm: 165.0, 162.2 (CO, C-1), 157.3 (C-3), 97.8 (C=C), 64.3 (C-7a), 46.0 (C-5), 39.6 (CH<sub>2</sub>NH), 32.0 (CH<sub>2</sub>), 31.0 (C-7), 5×29.8, 2×29.7, 29.5, 29.4, 27.1 (10×CH<sub>2</sub>), 26.3 (C-6), 22.8 (CH<sub>2</sub>), 14.2 (CH<sub>3</sub>).

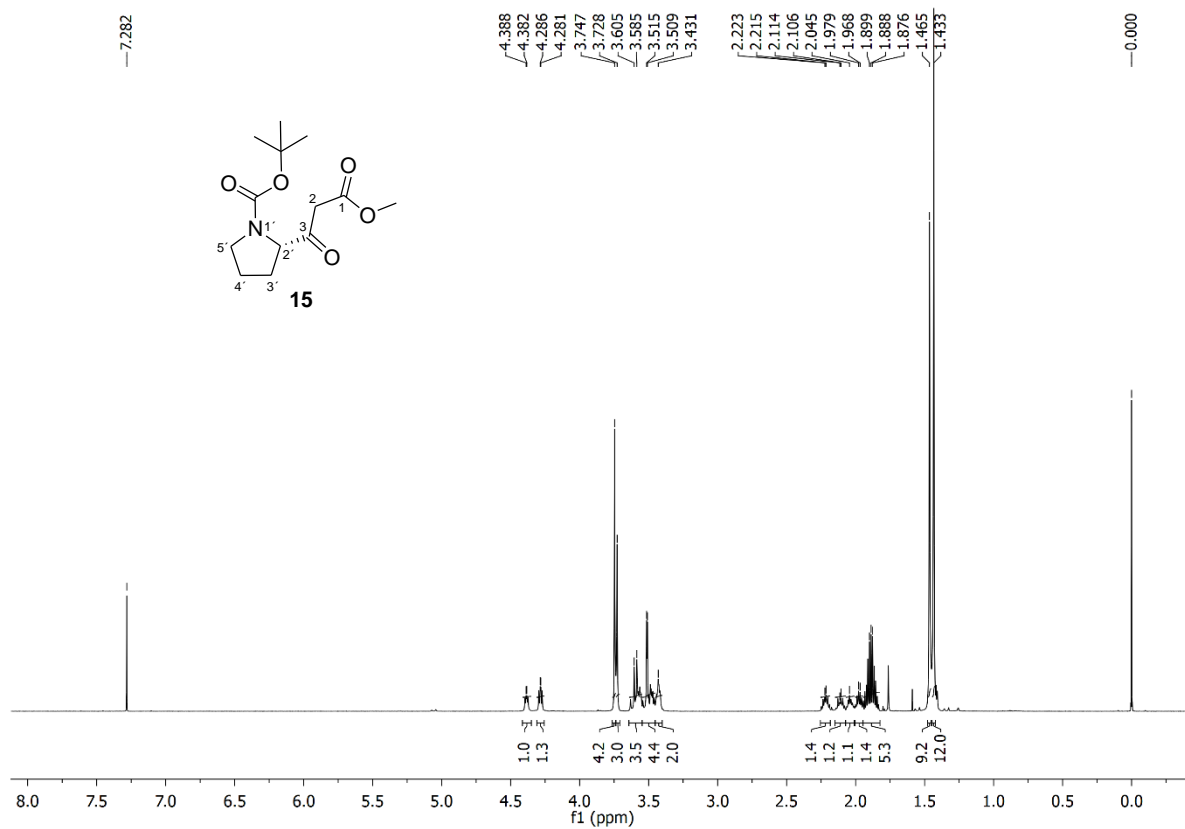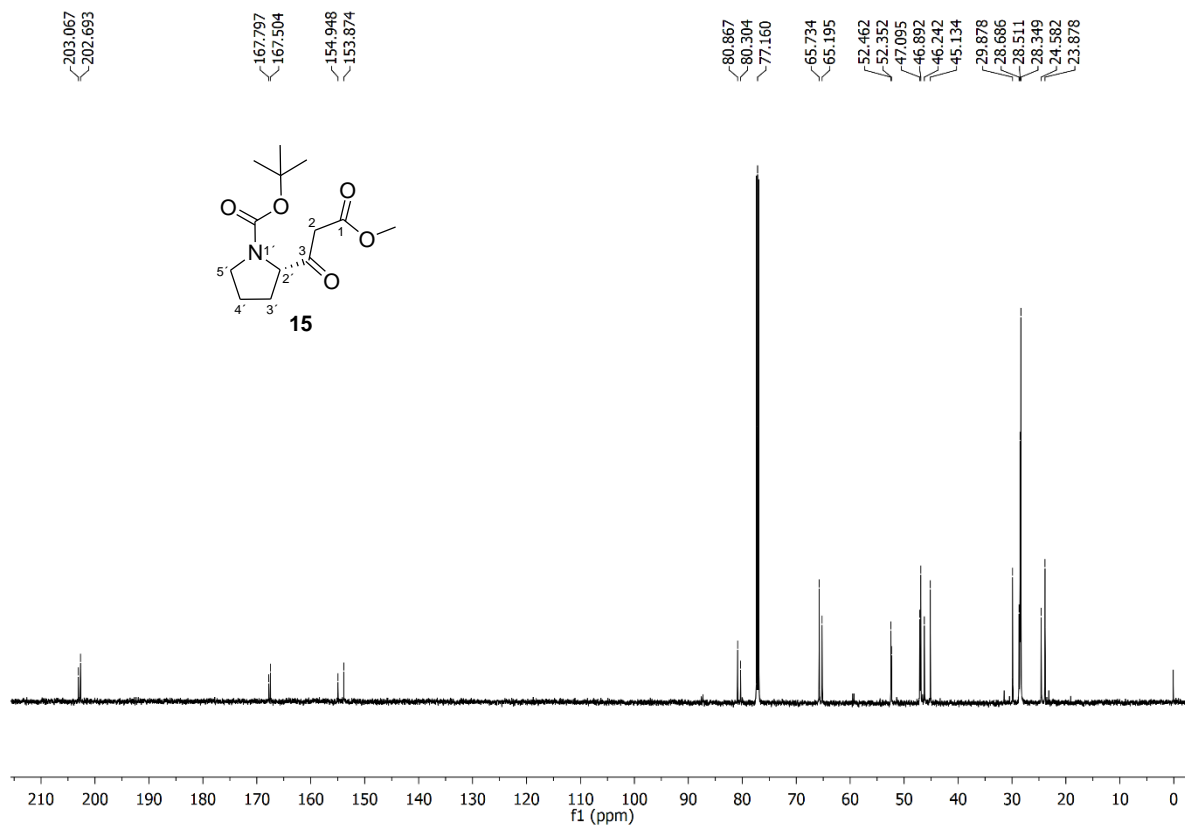

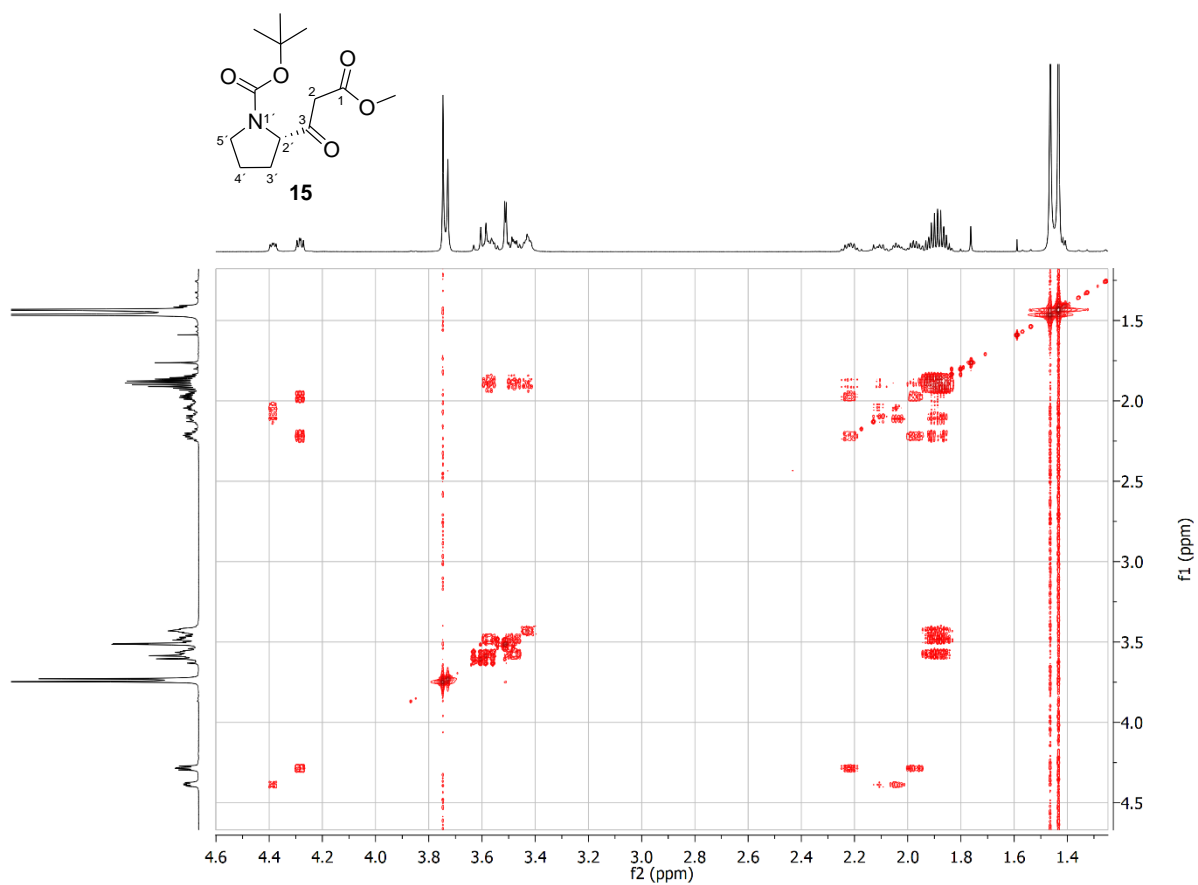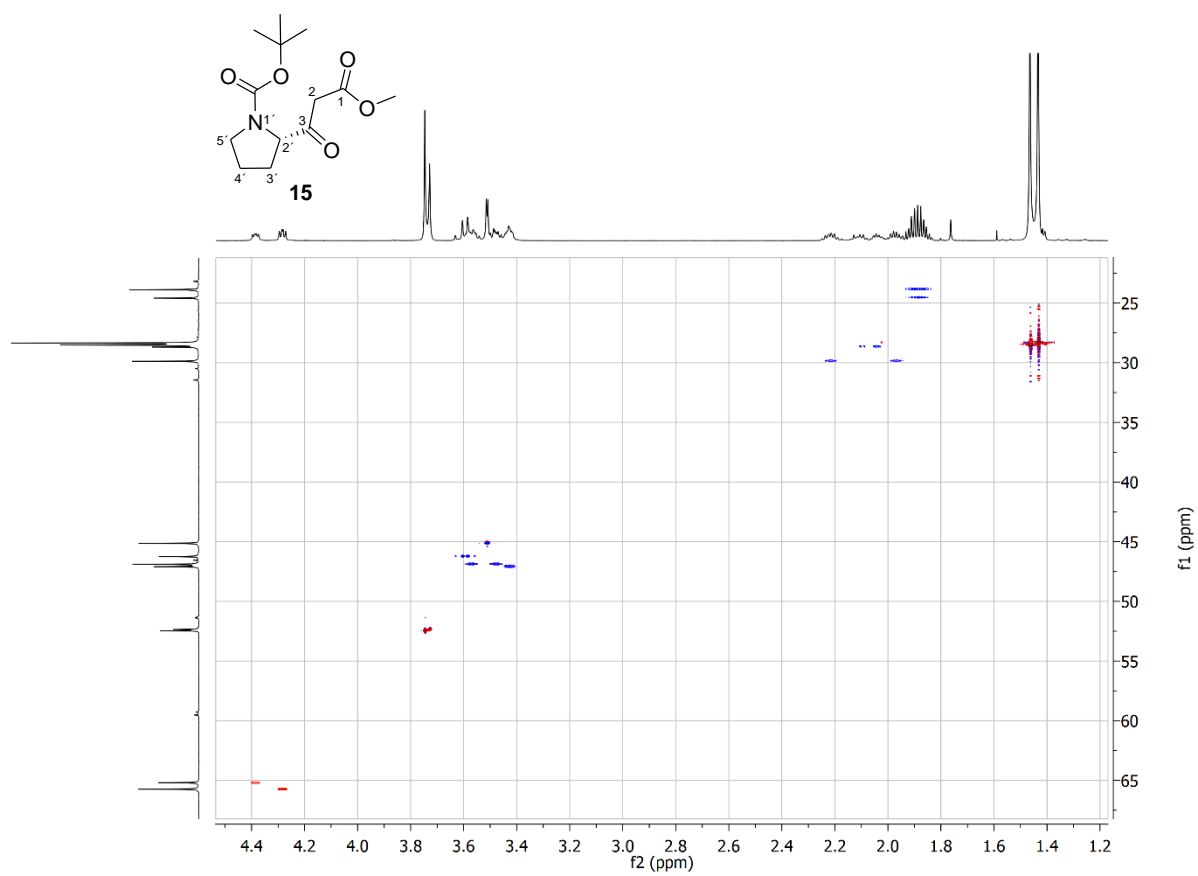

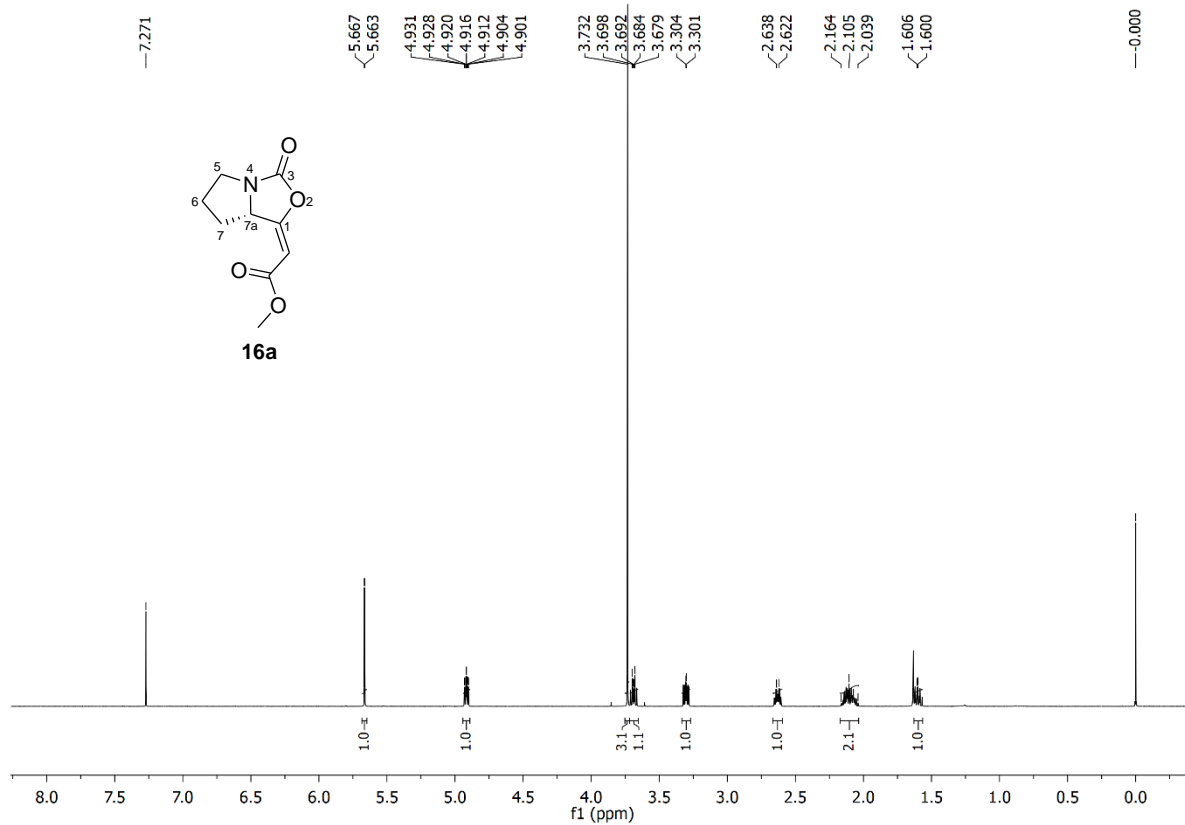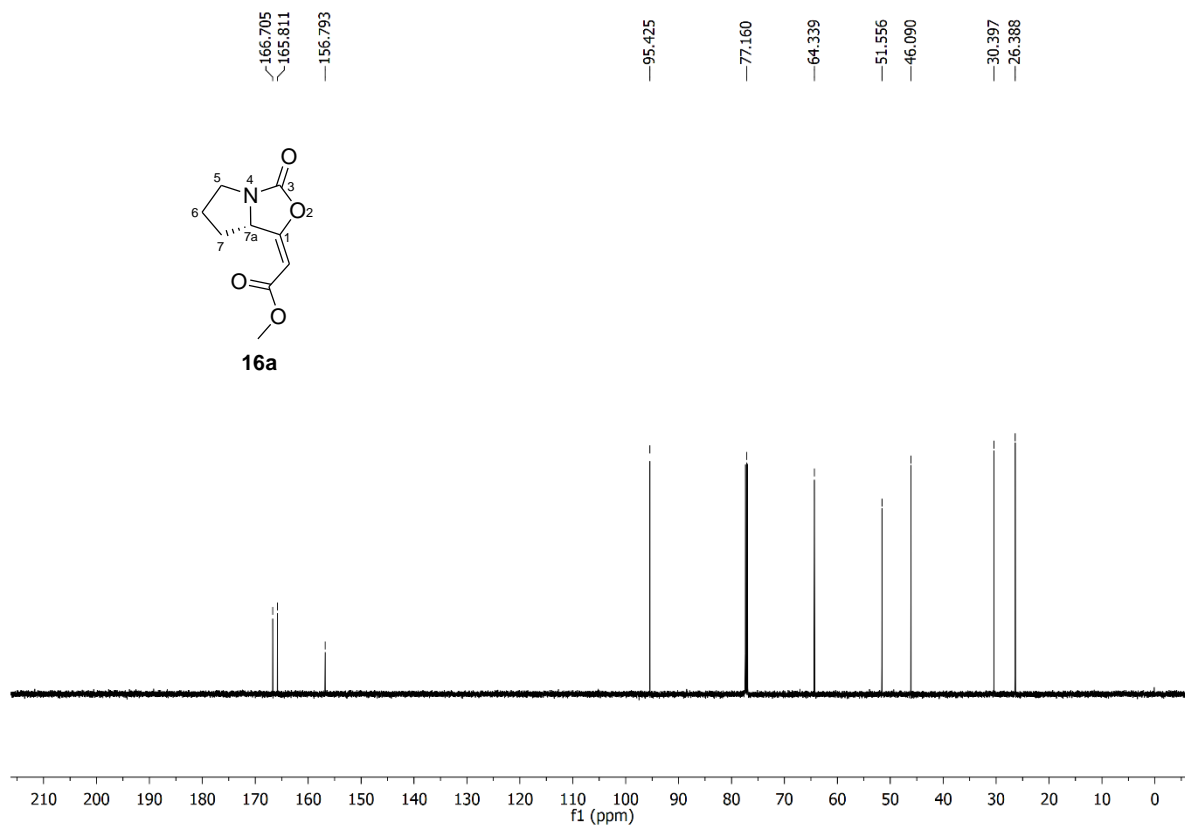

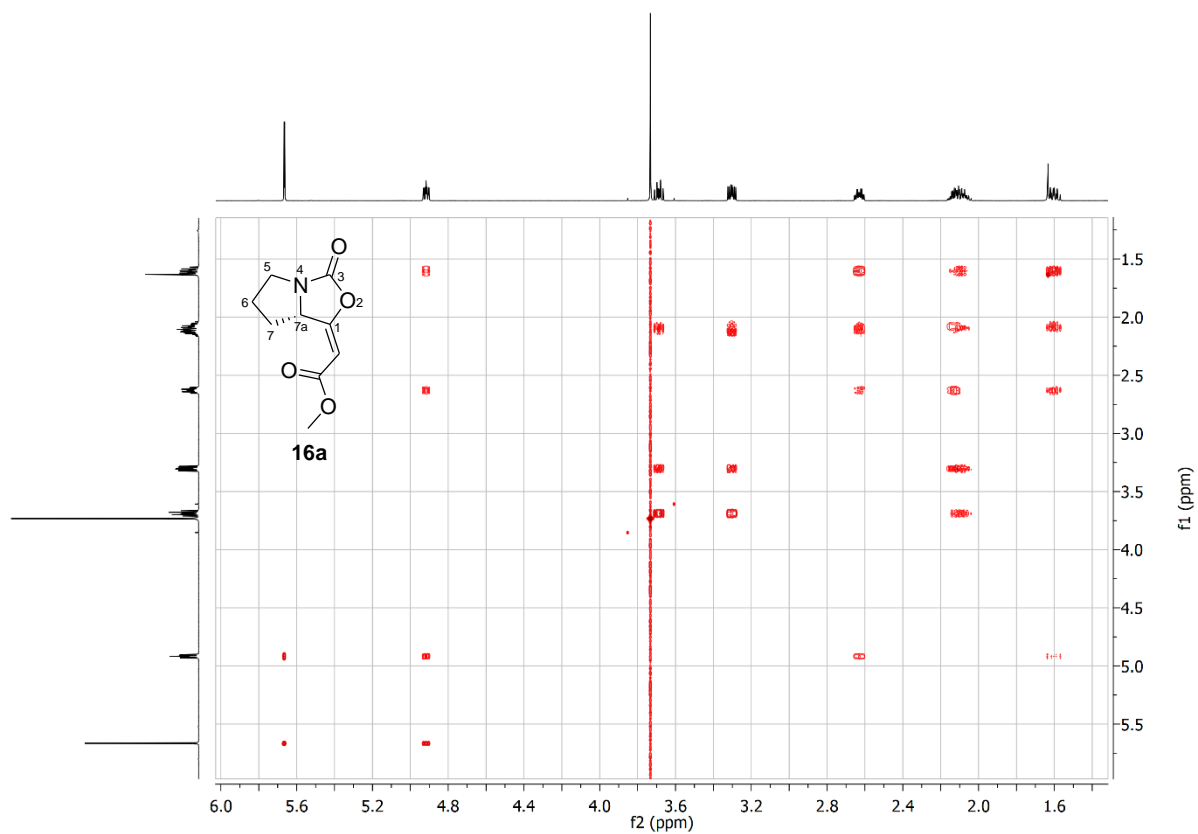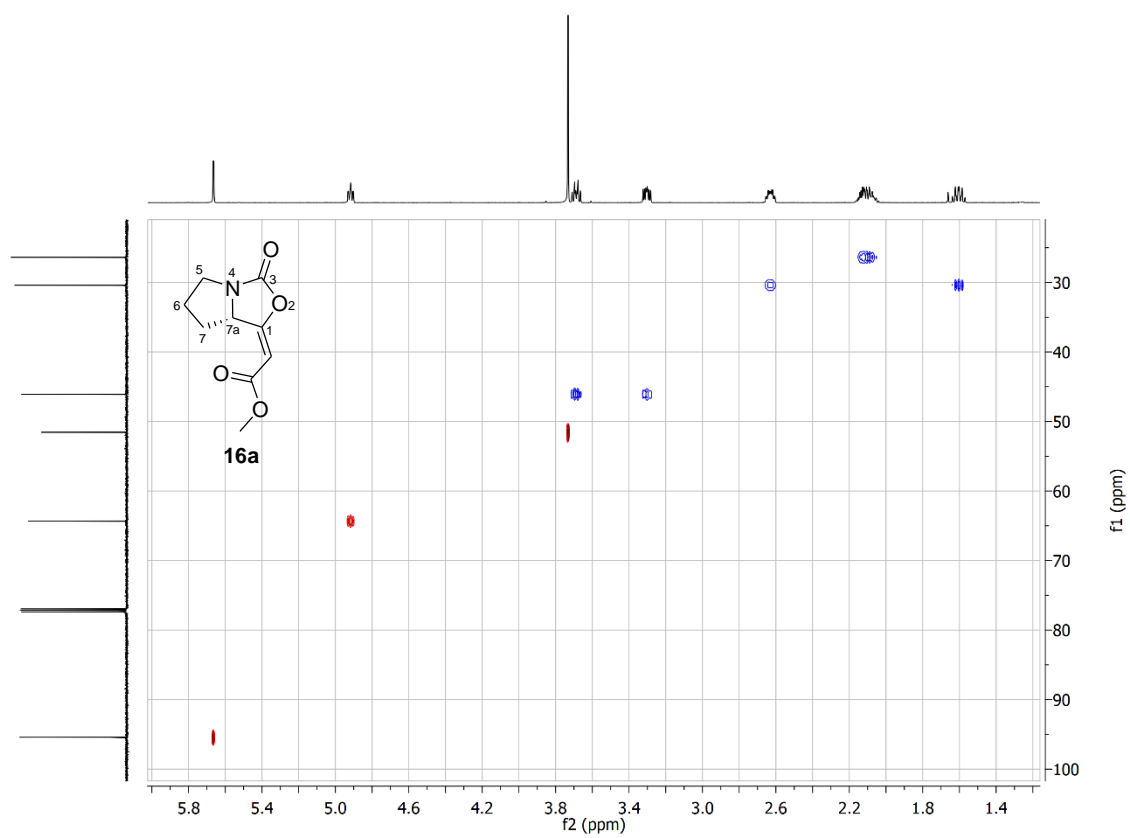

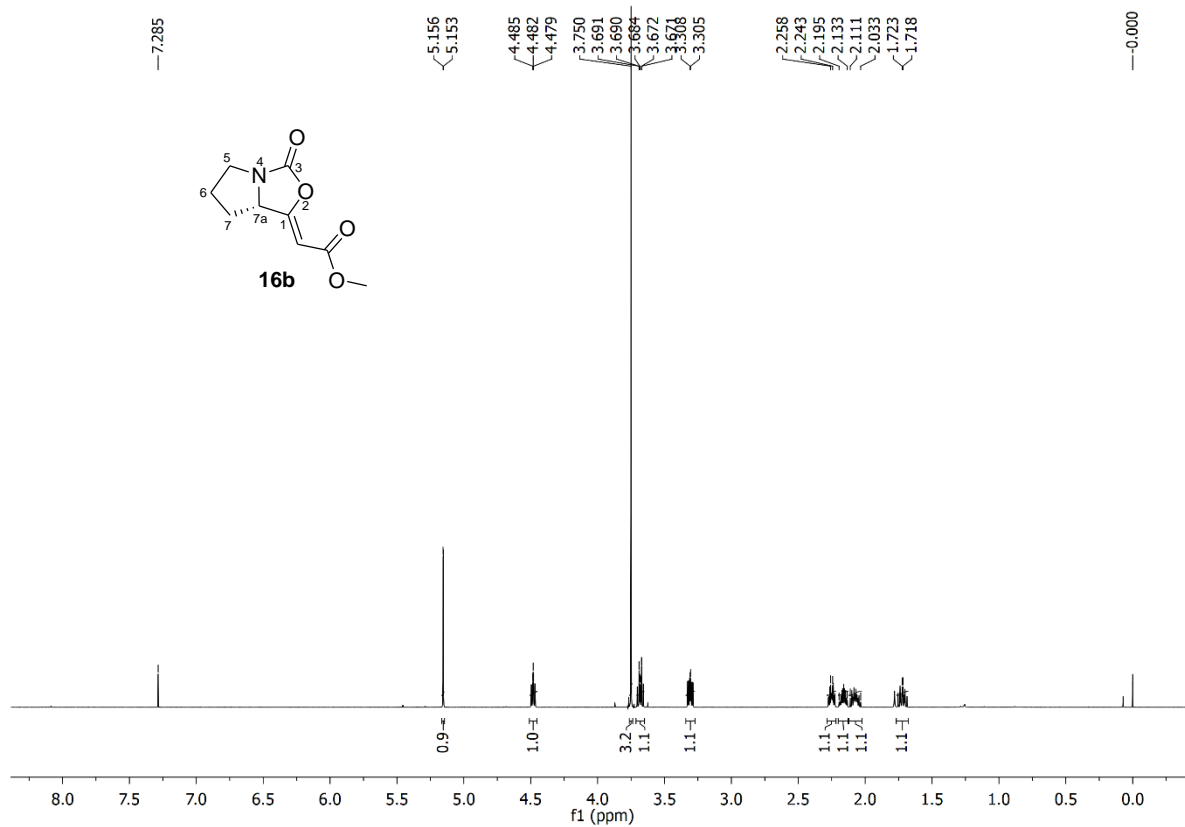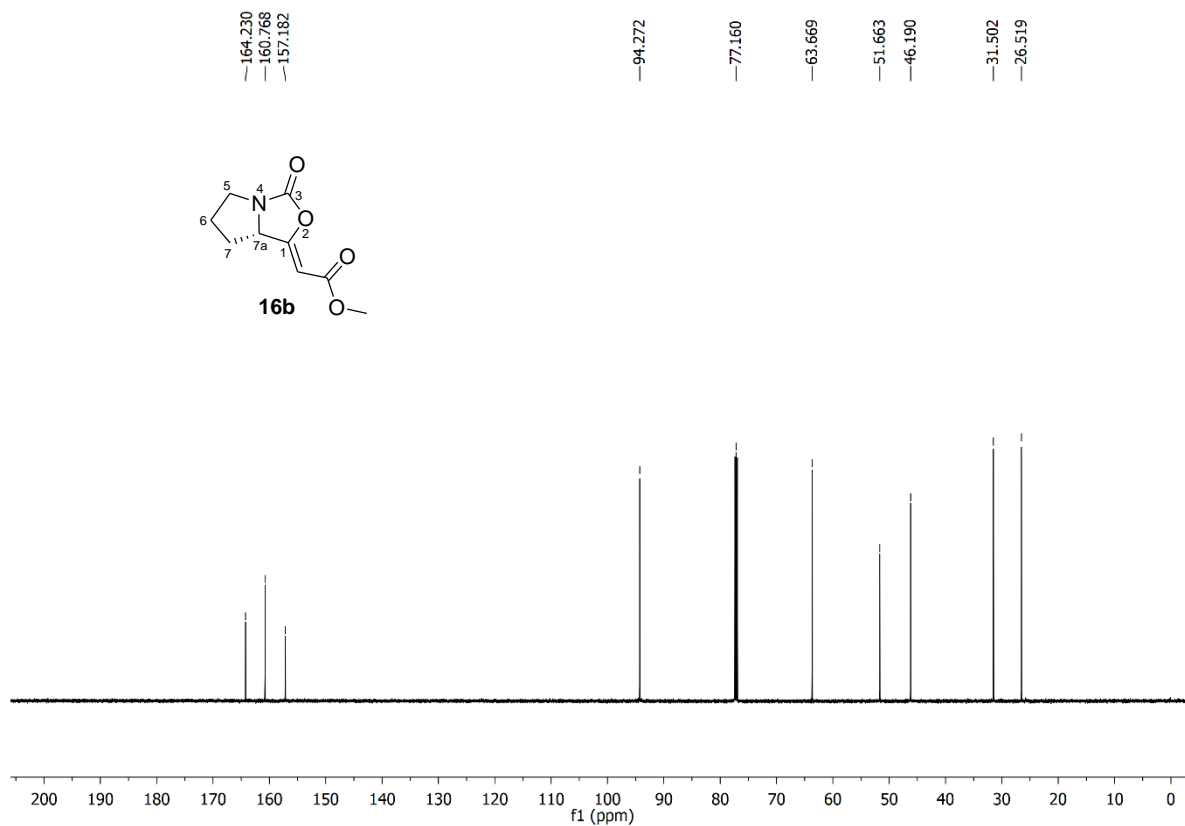

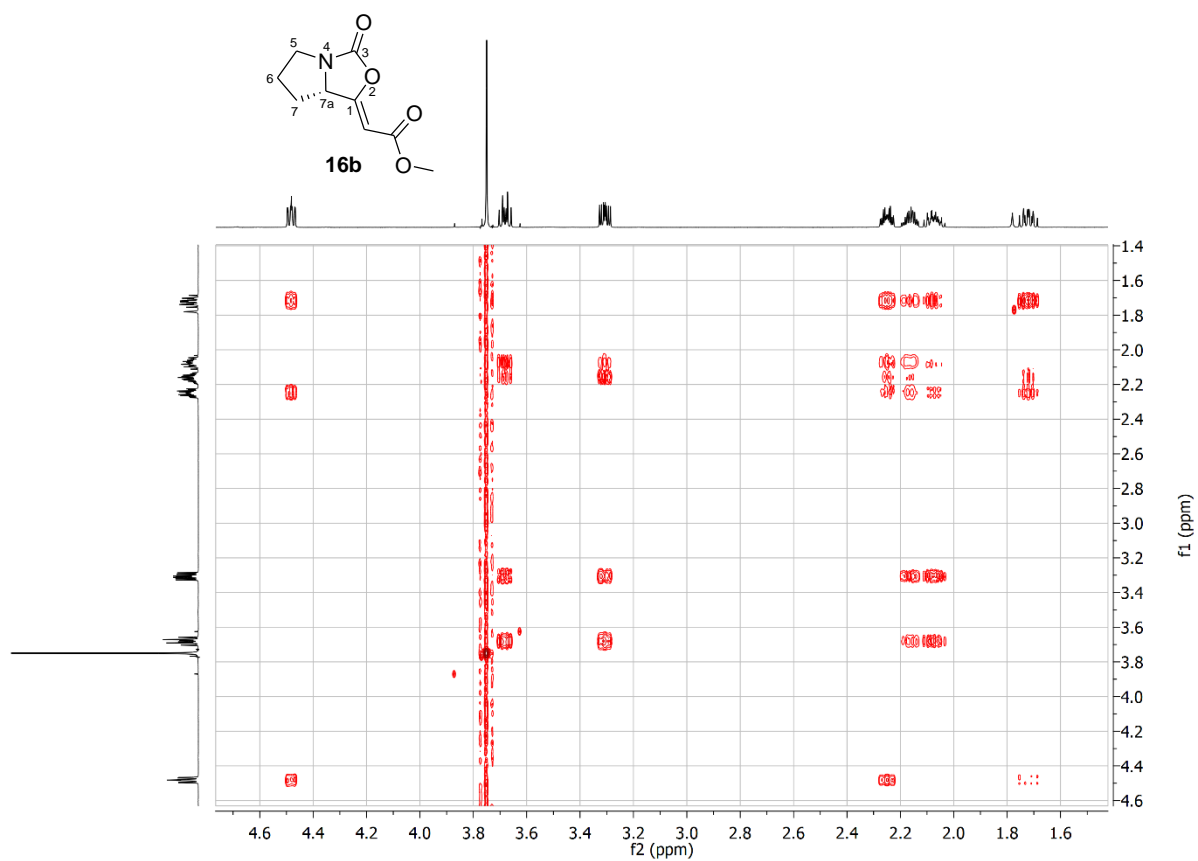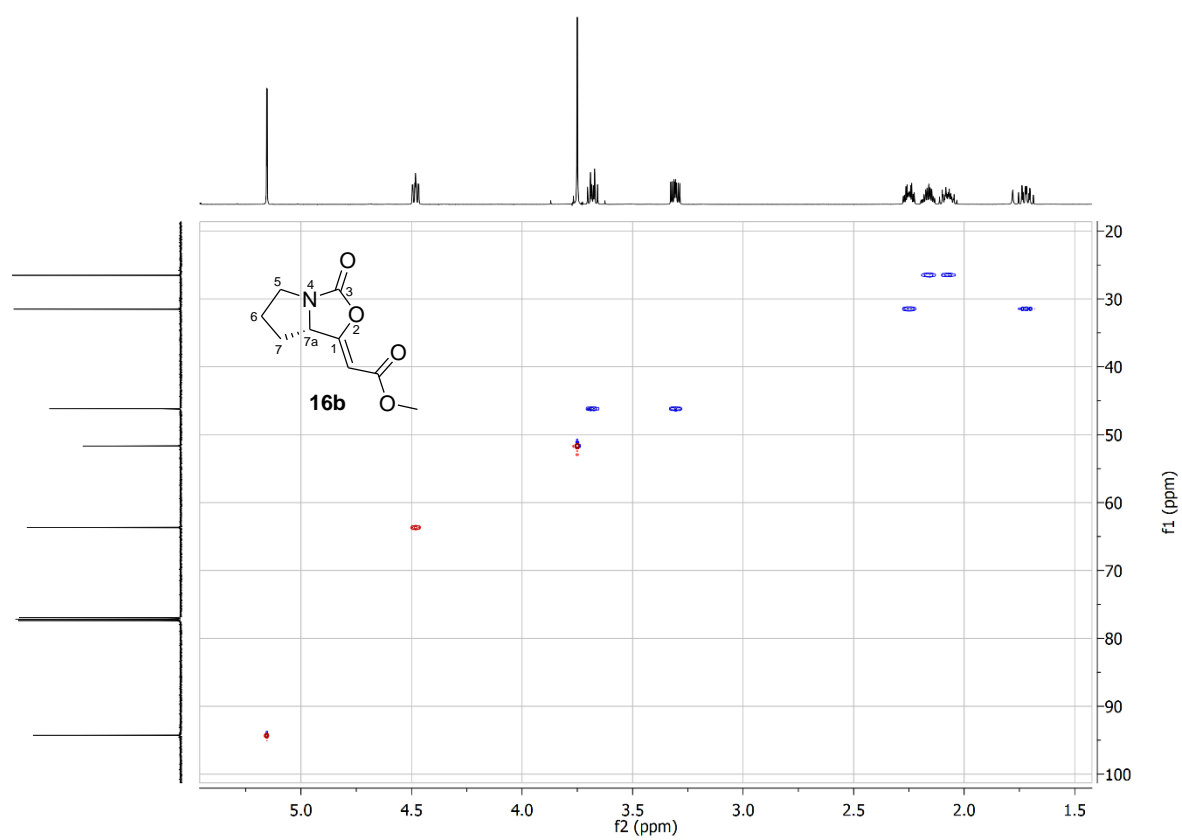

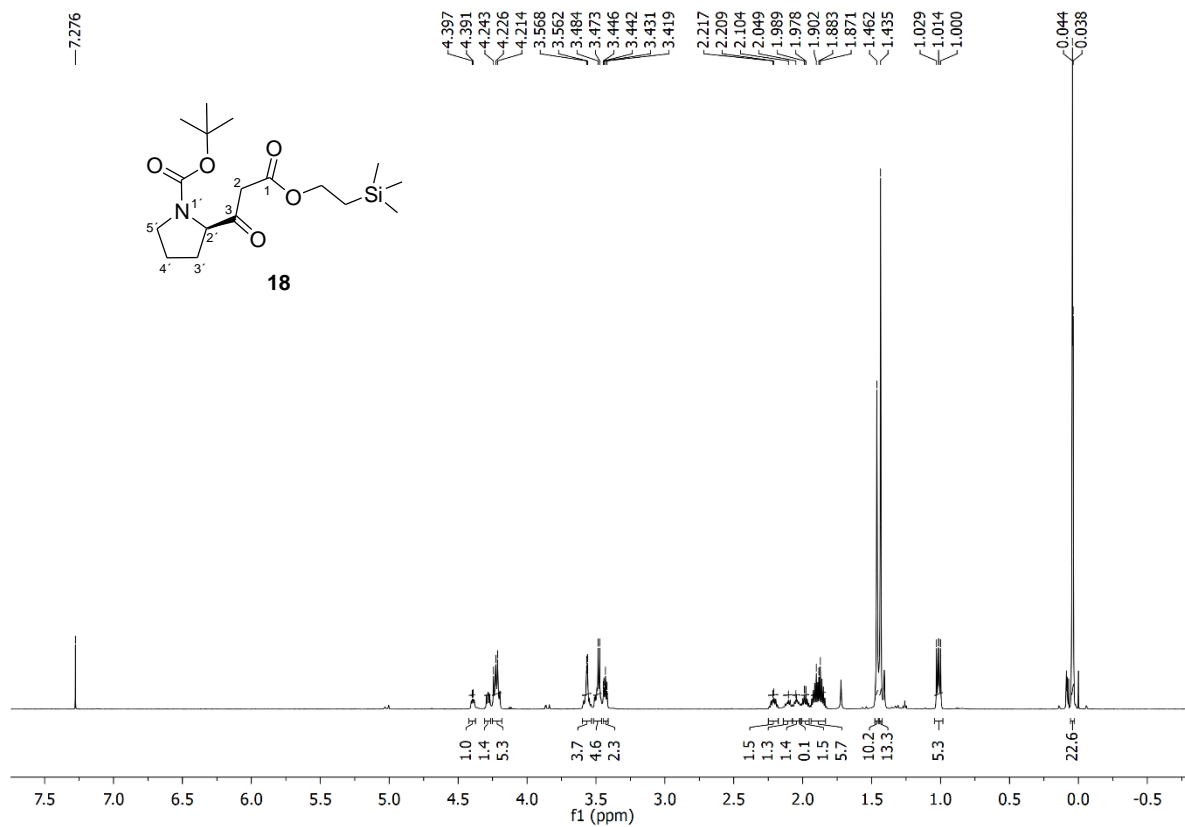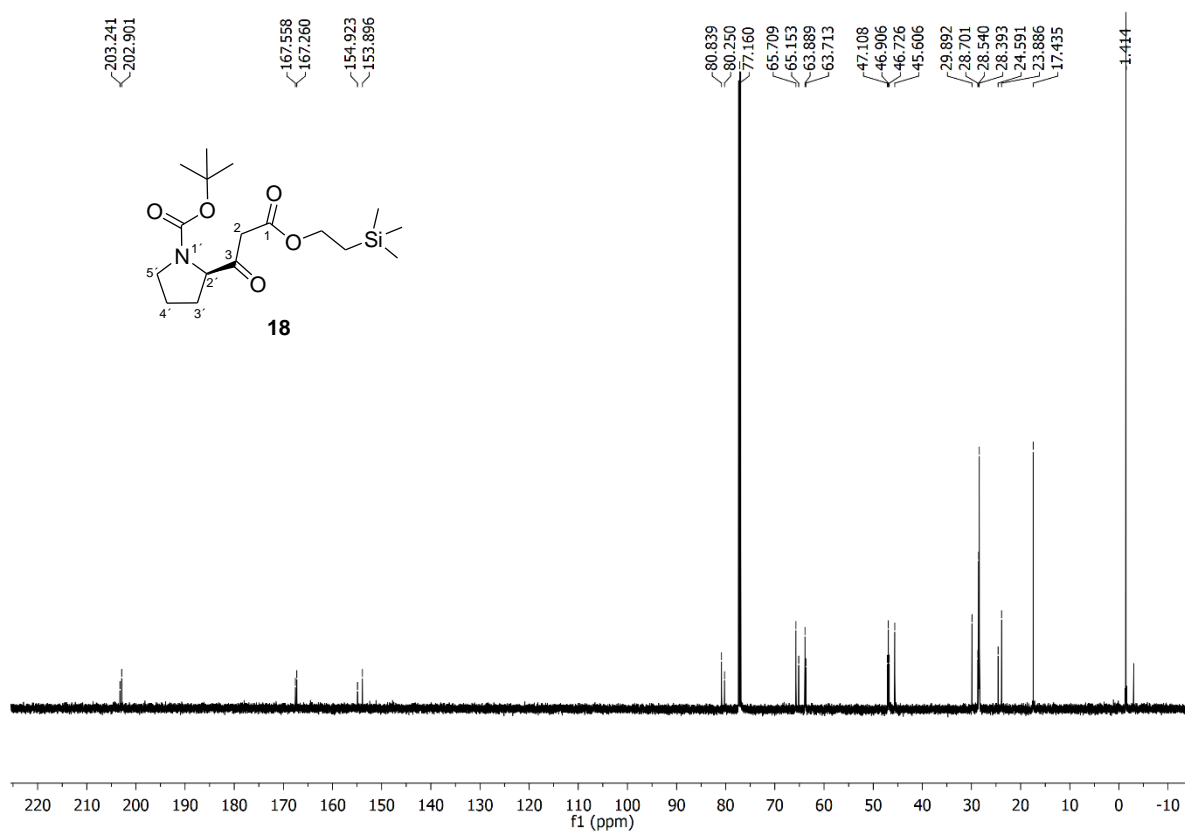

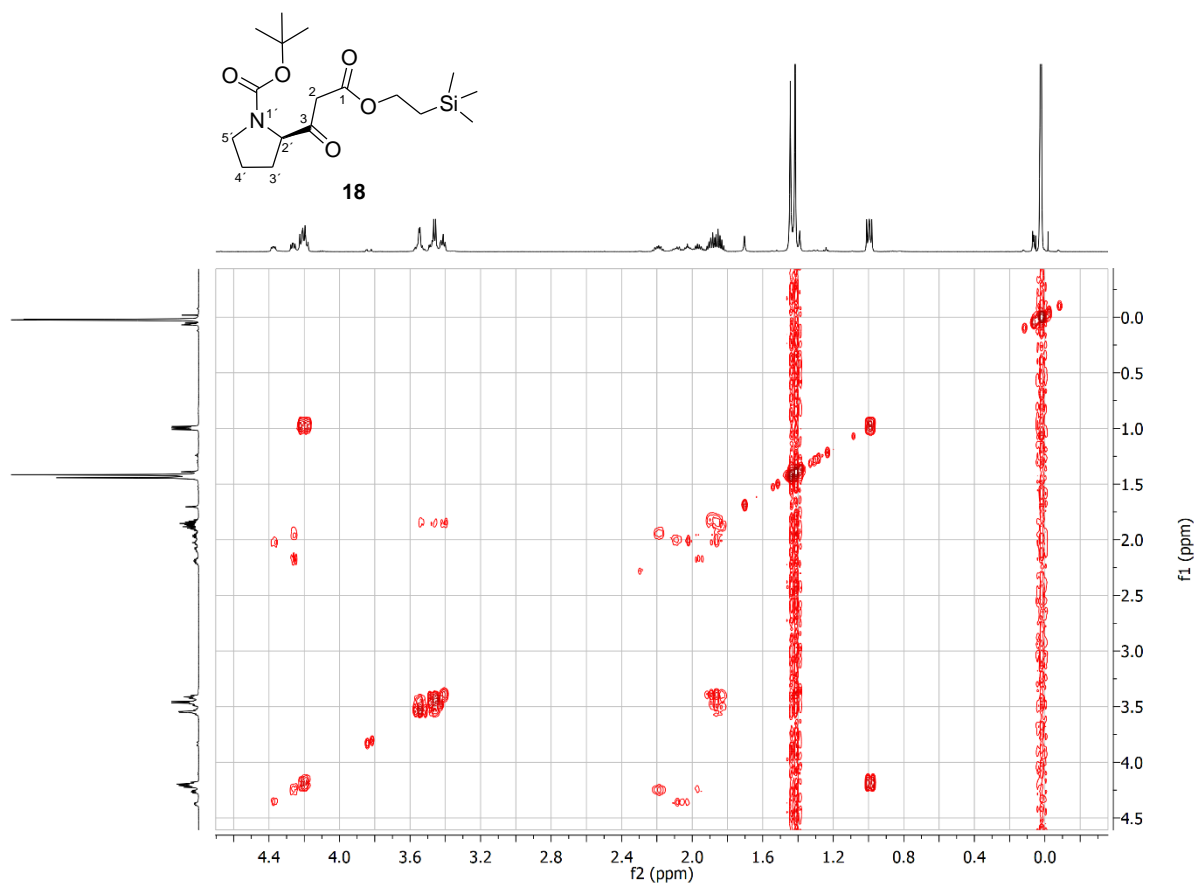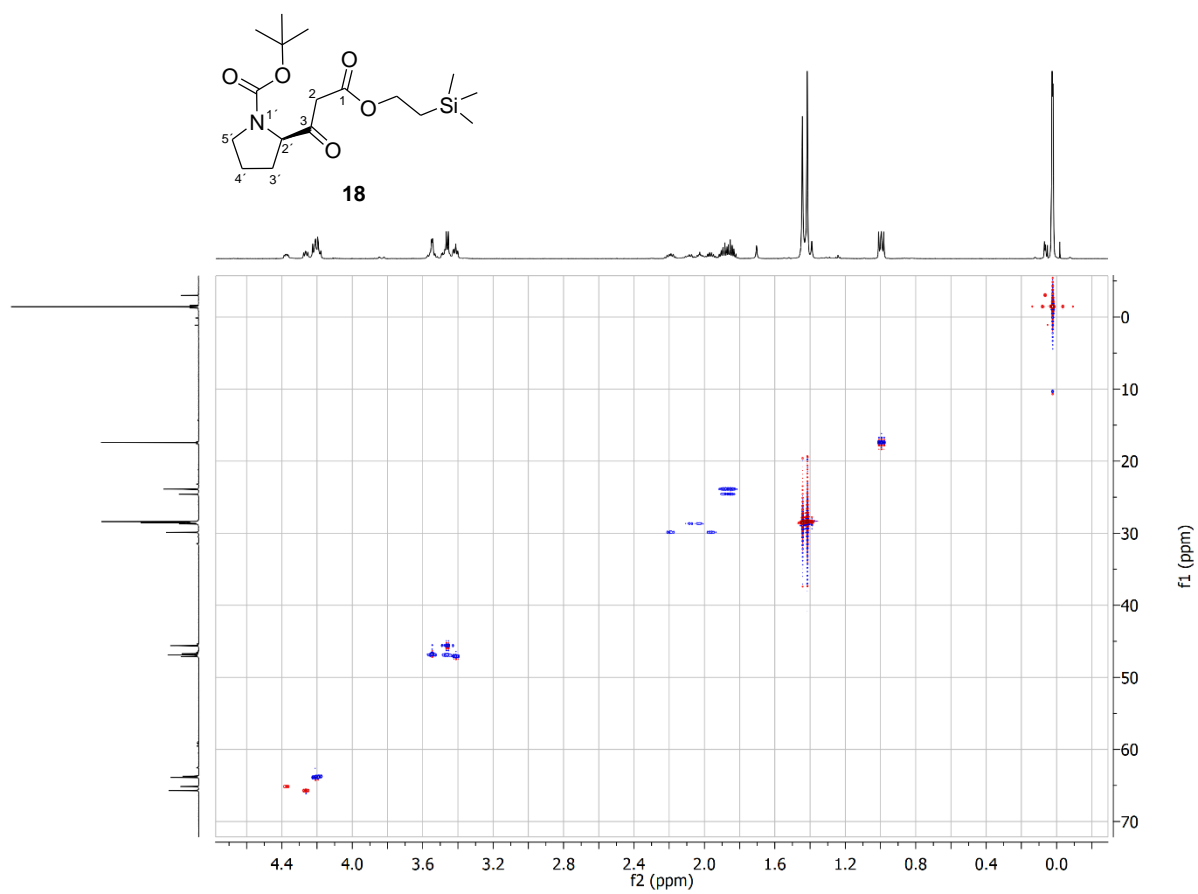

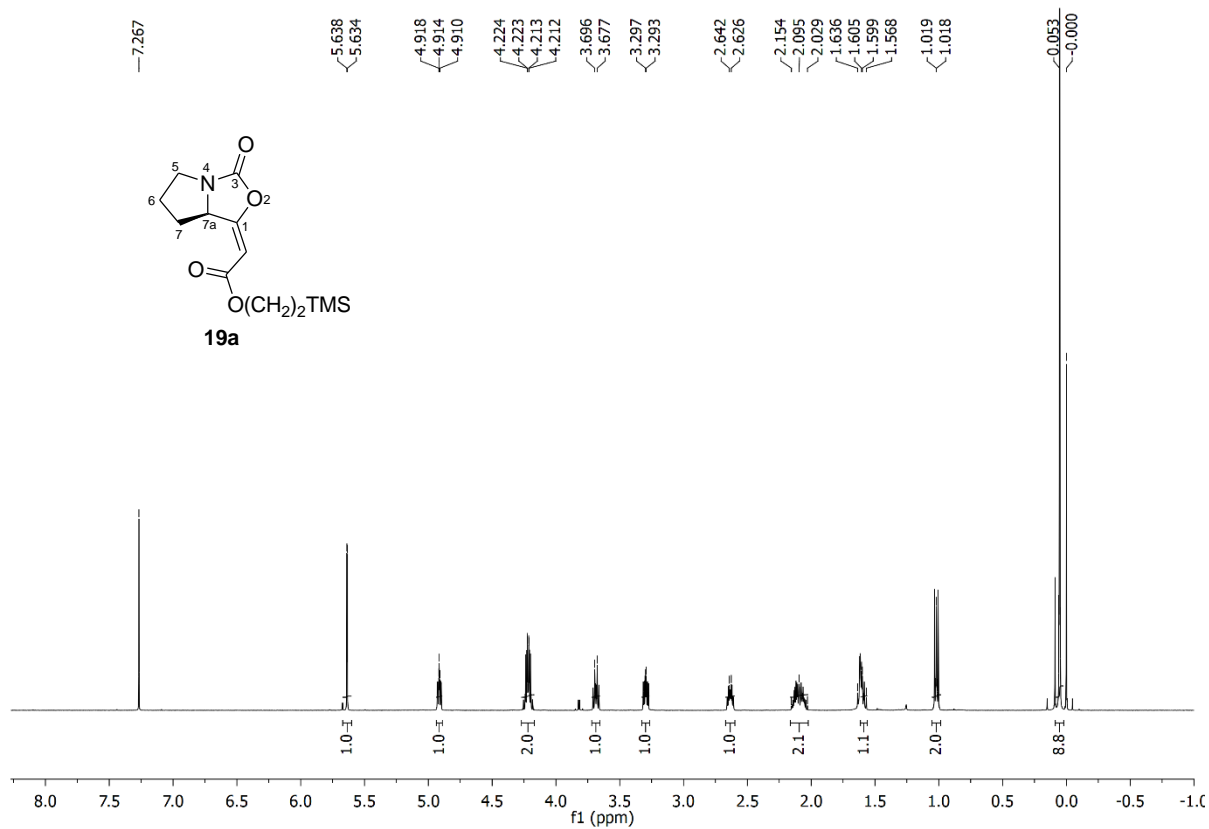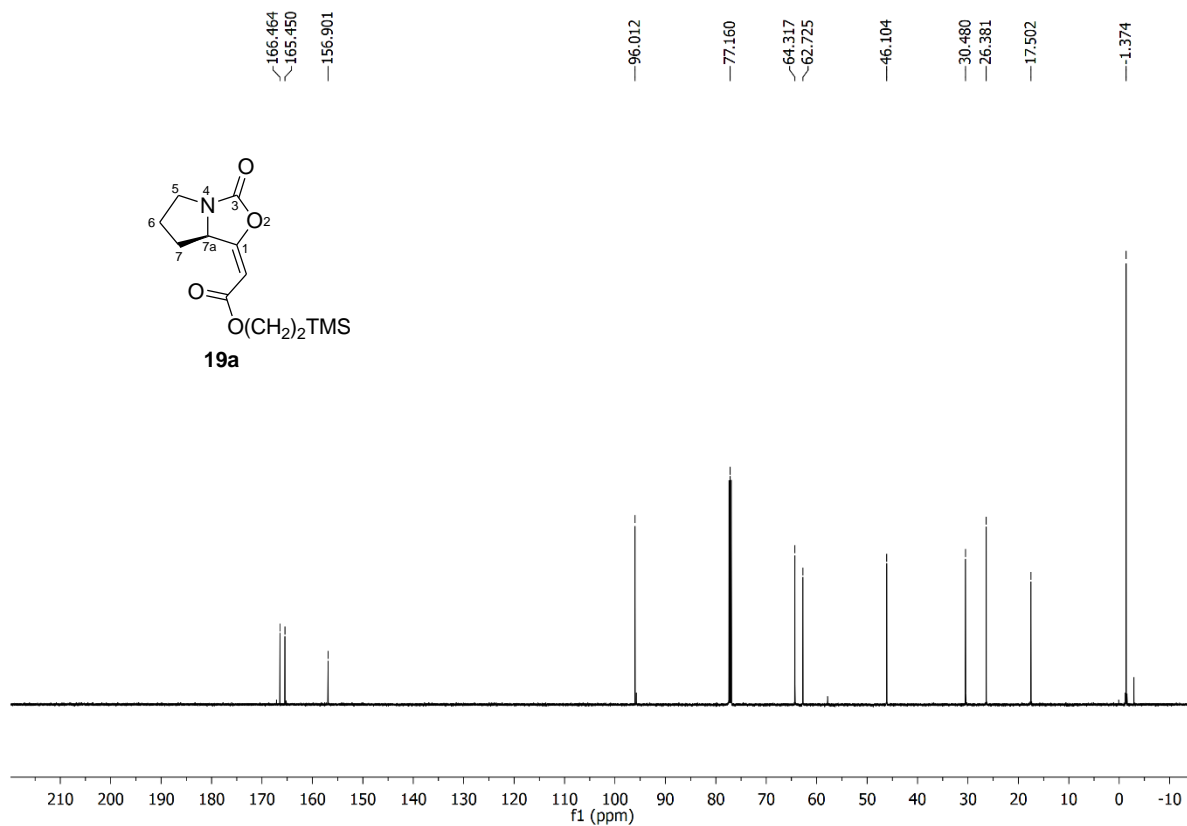

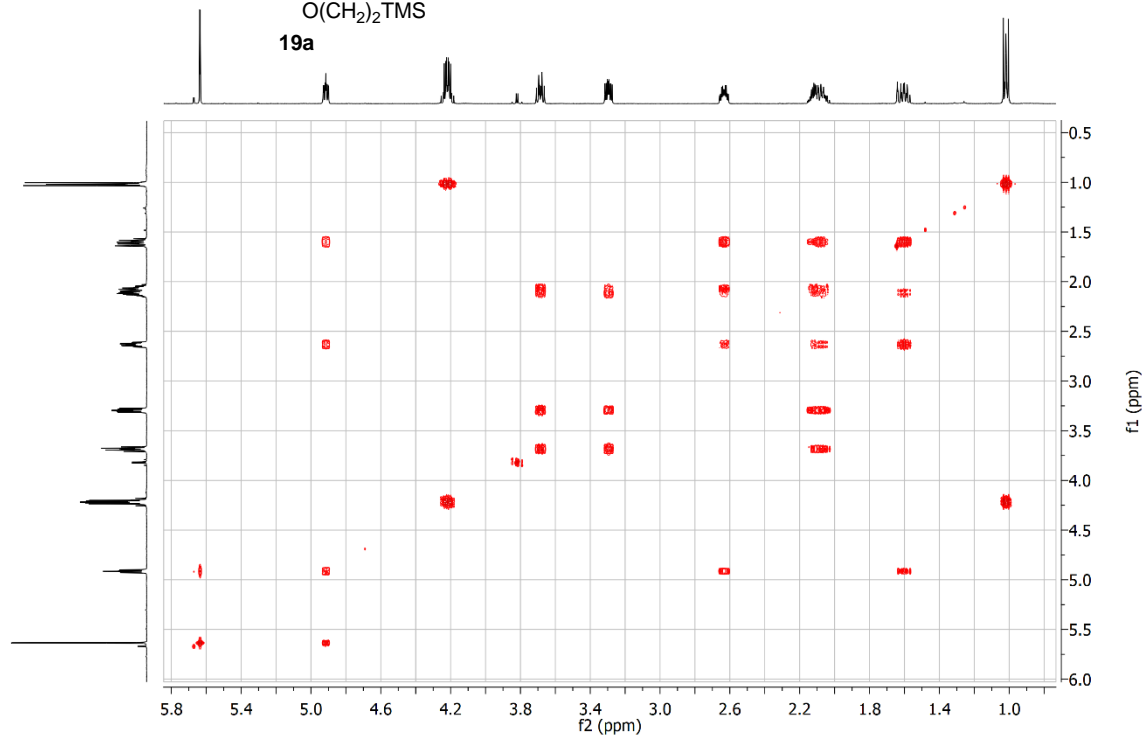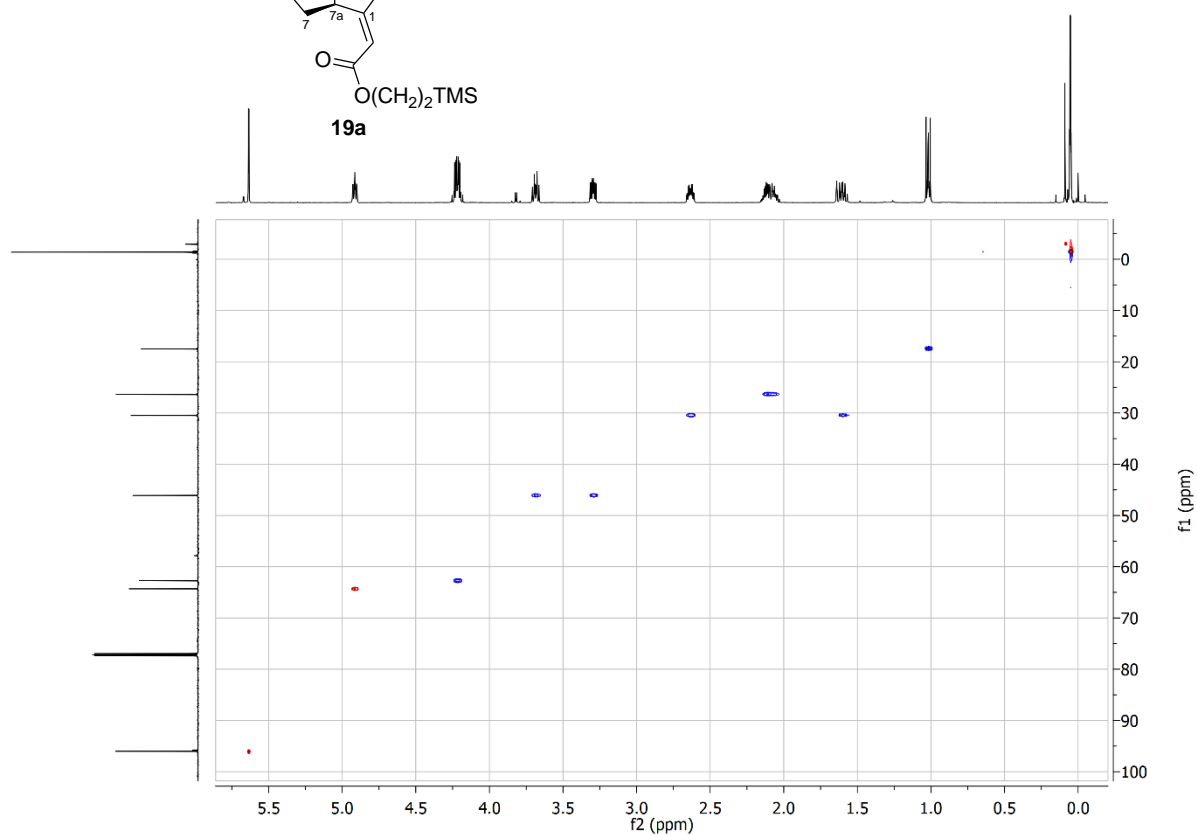

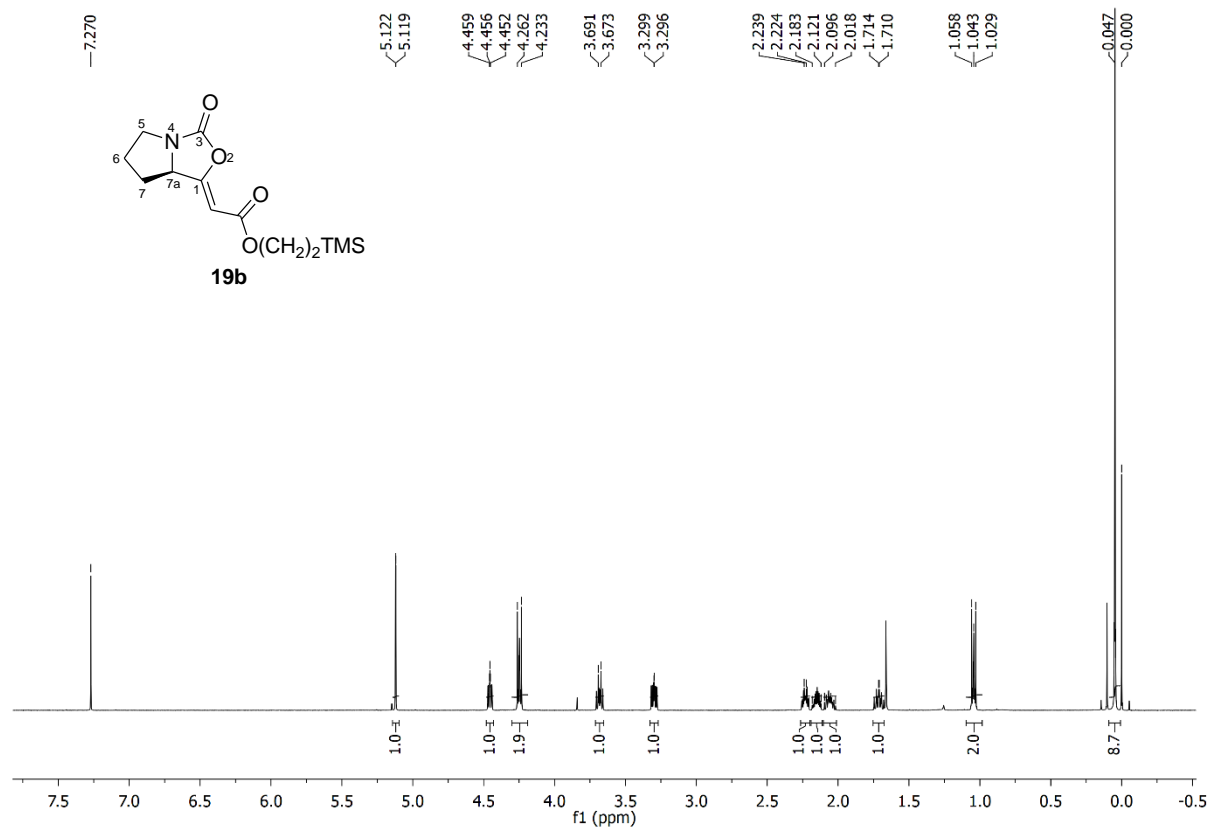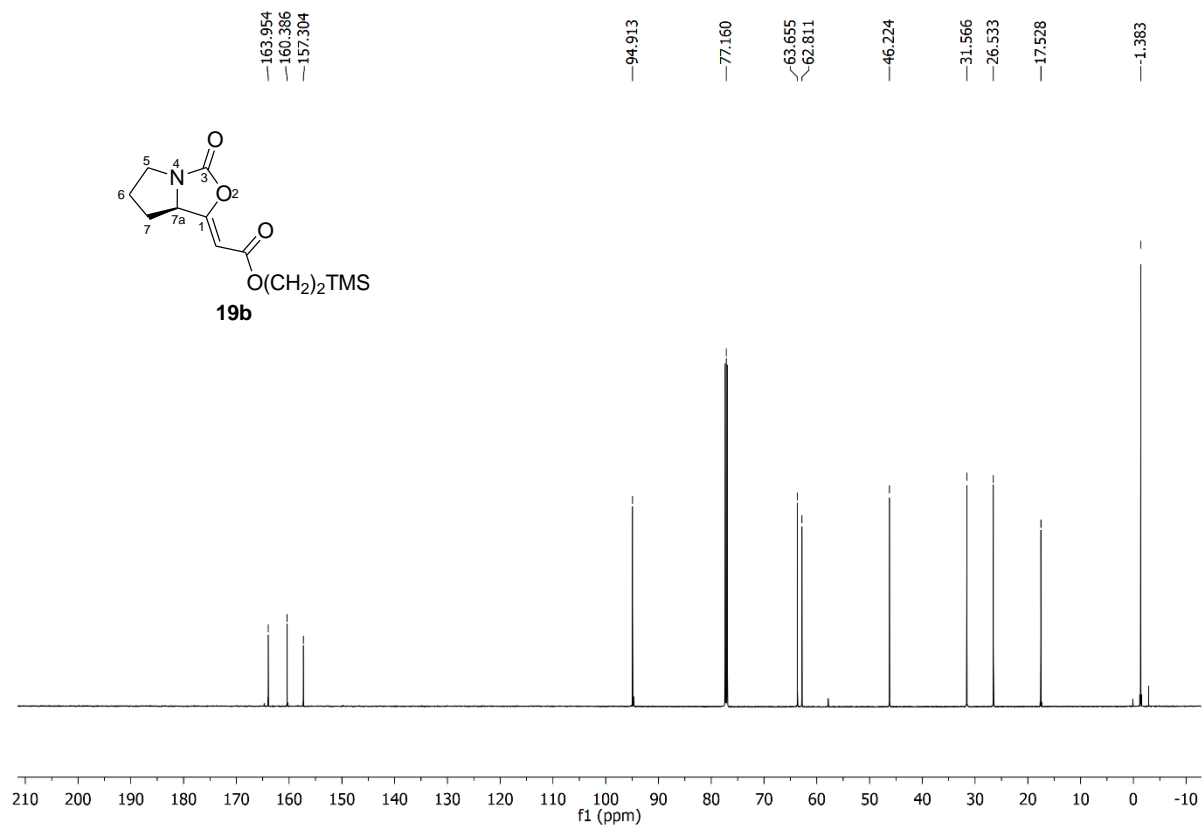

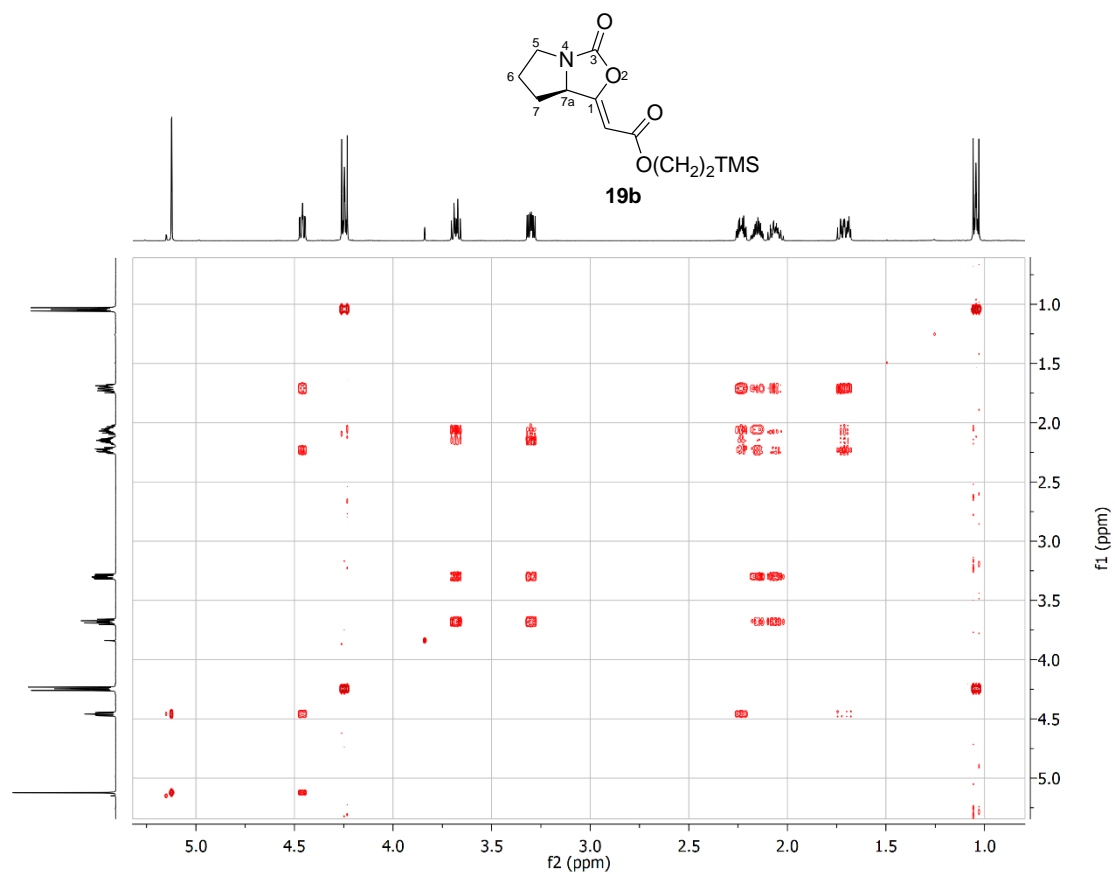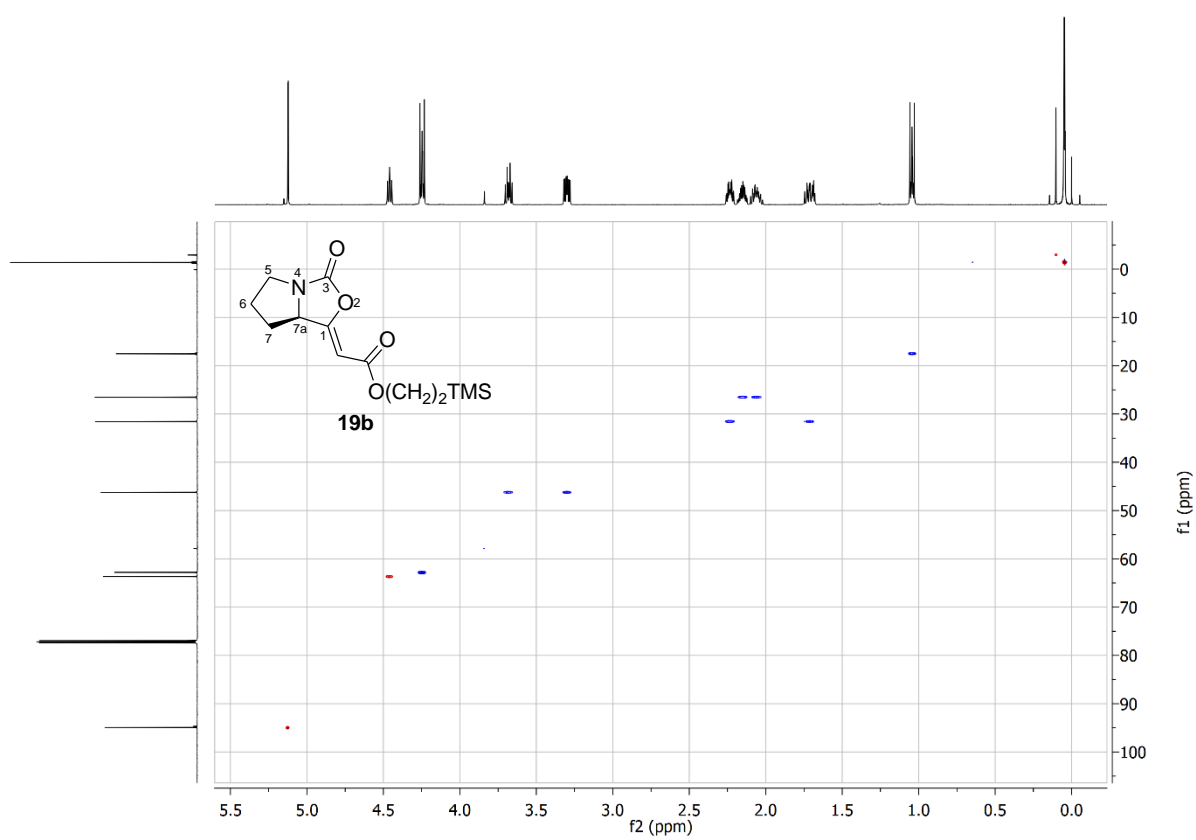

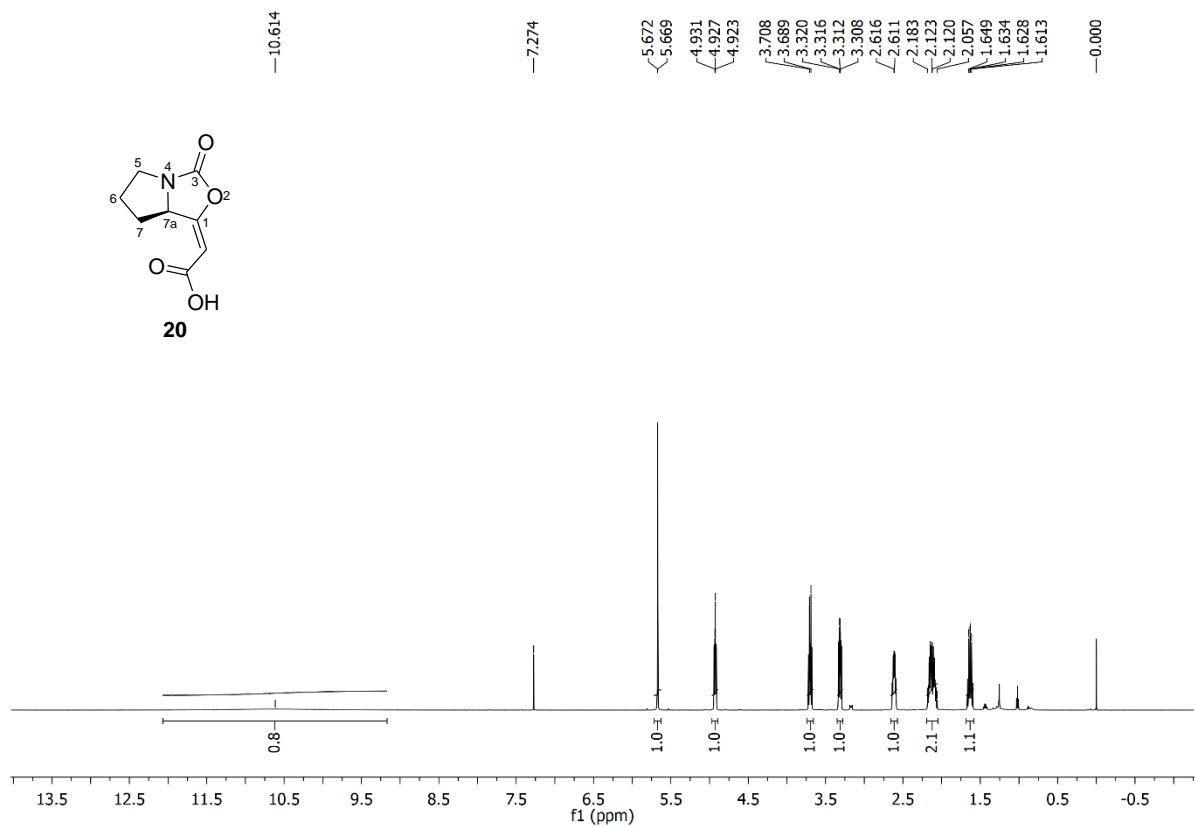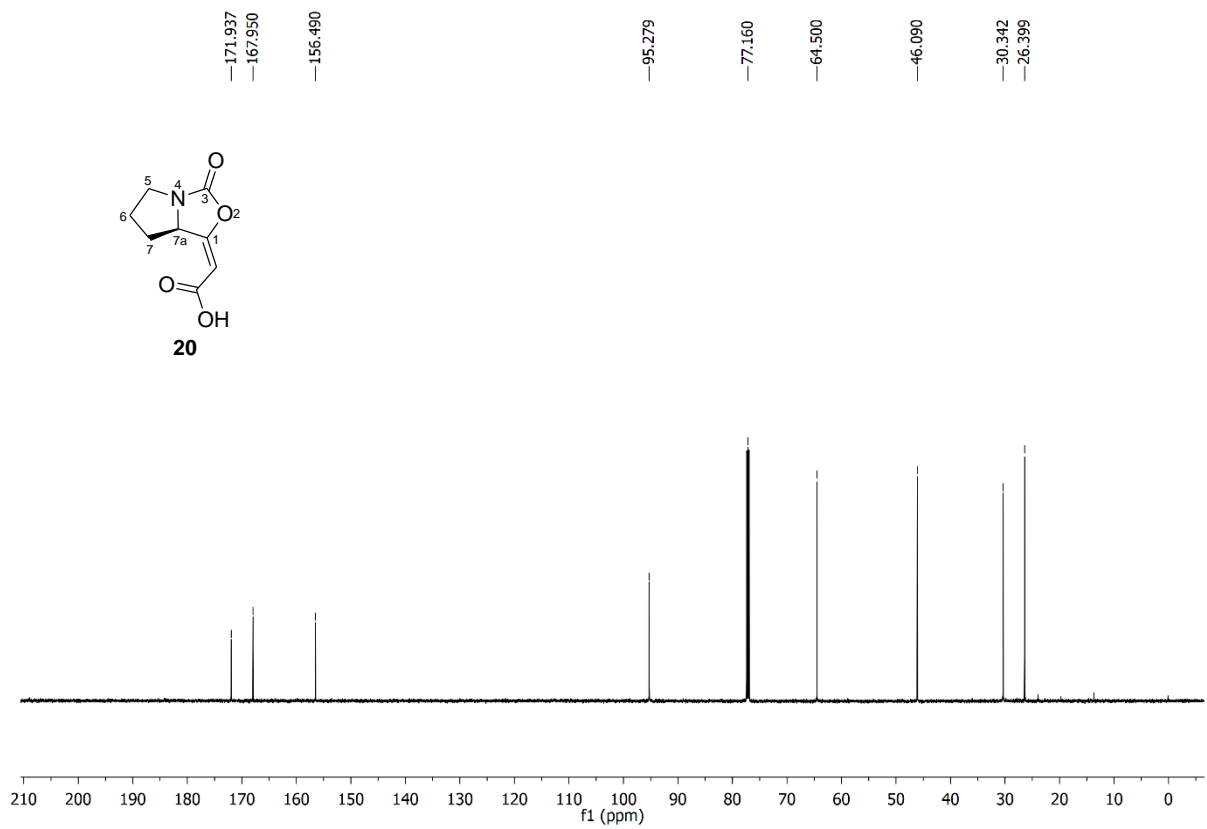

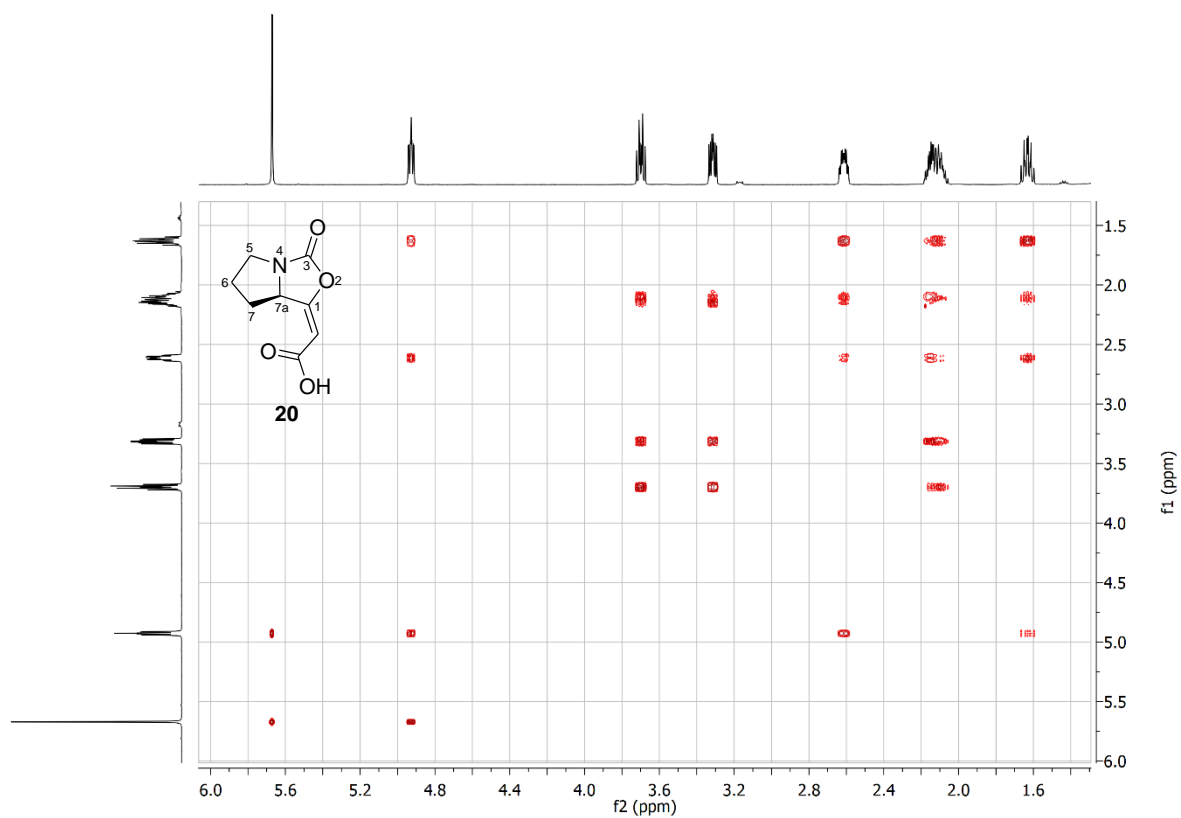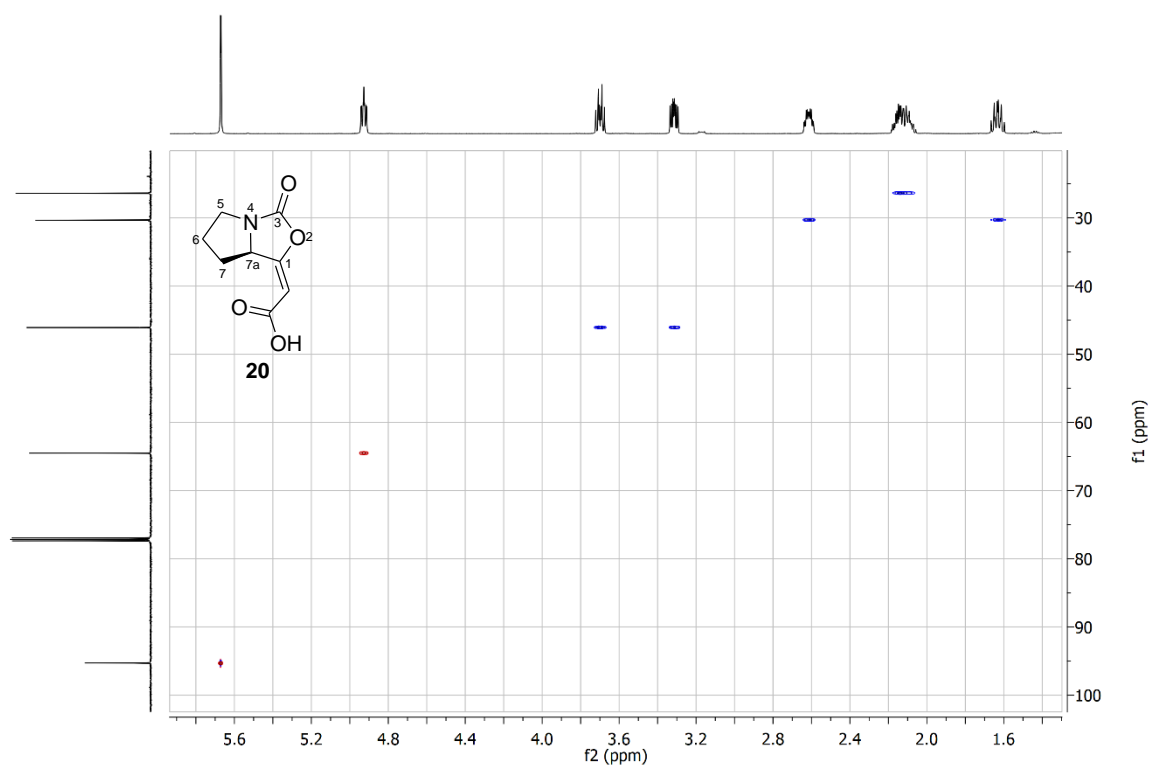

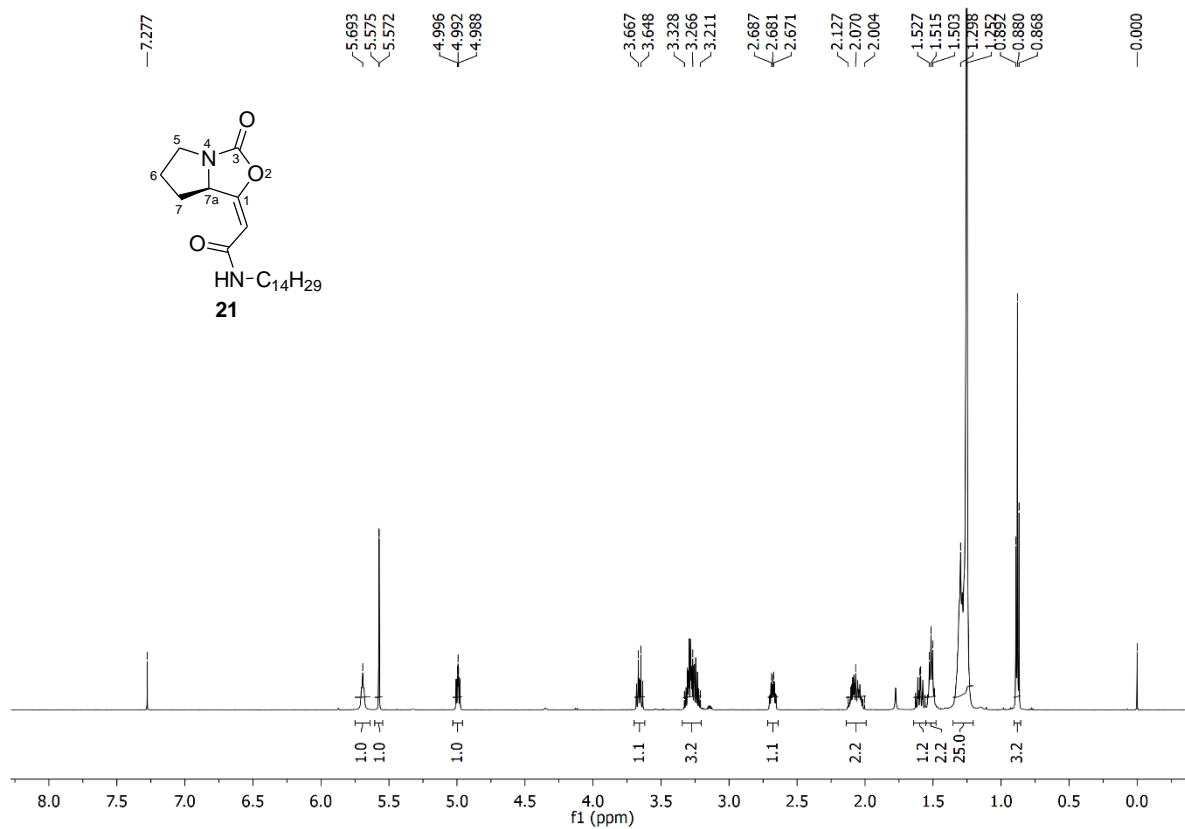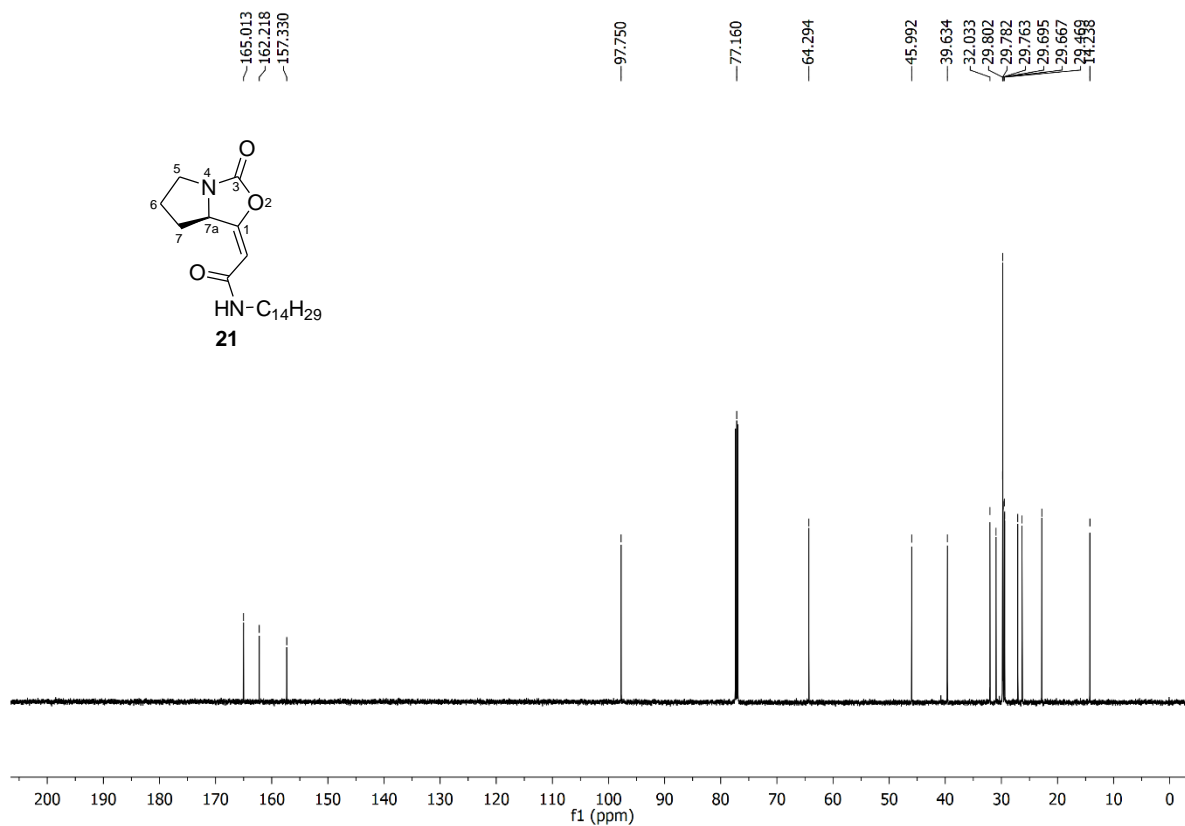

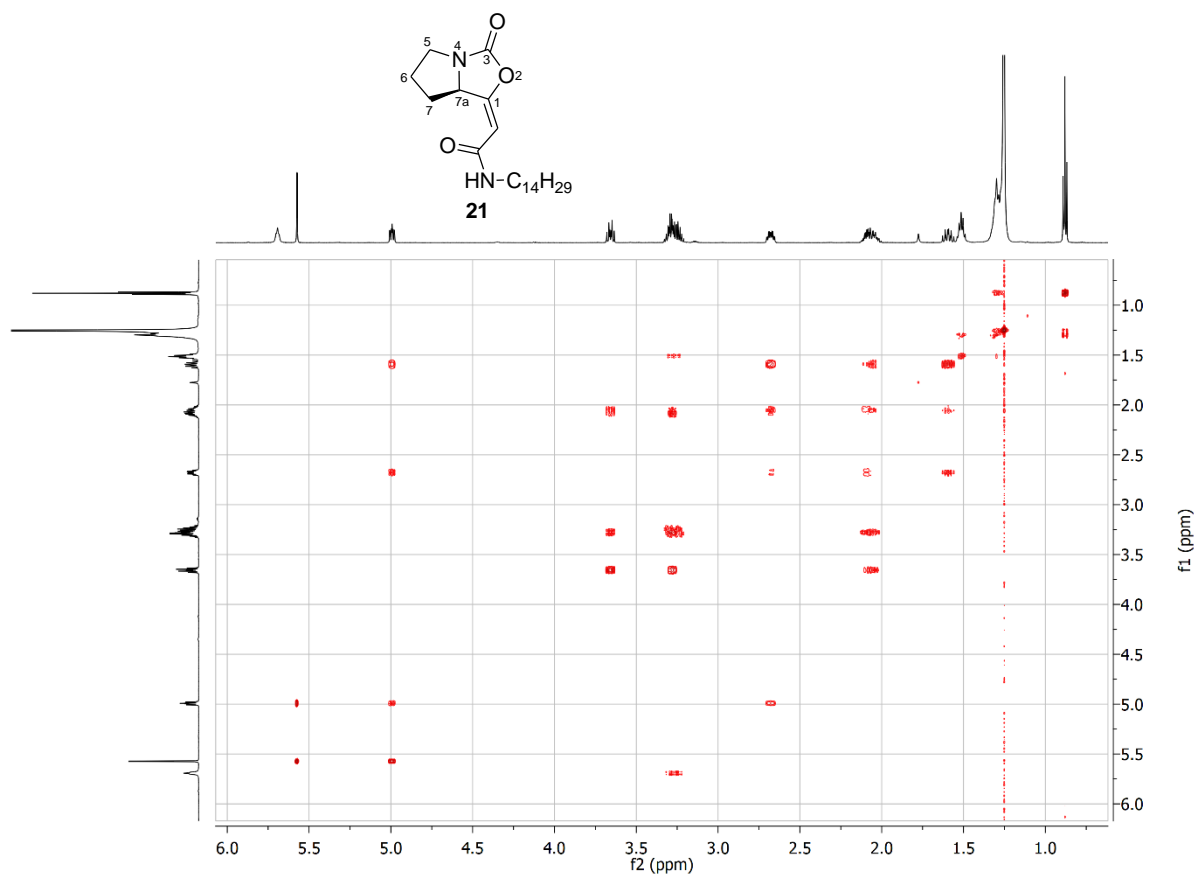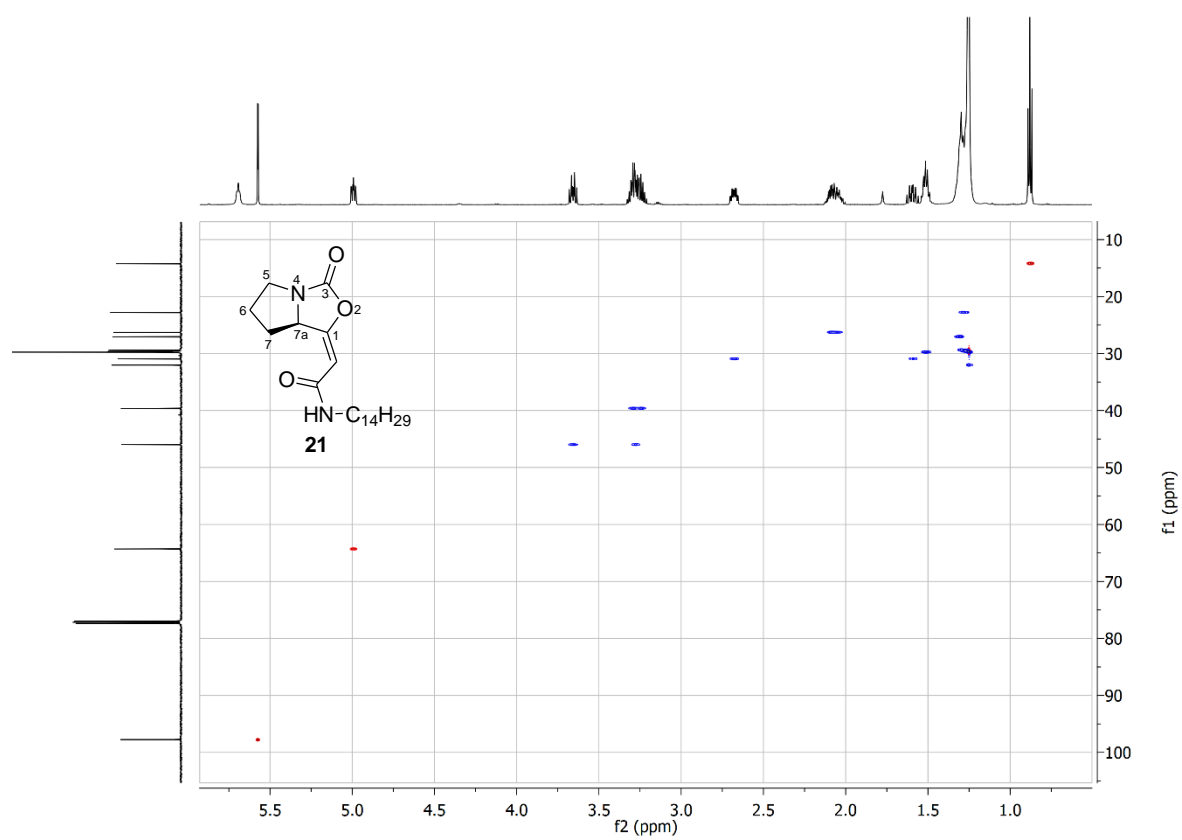

## X-Ray Crystallography

Data collection and cell refinement of **16a** (Fig. X1), **20** (Fig. X2) and **21** (Fig. X3) were made by Stoe StadiVari diffractometer at 100 K using Pilatus3R 300K HPAD detector and microfocused source Xenocs Genix3D Cu HF (Cu K $\alpha$  radiation  $\lambda = 1.54186$  Å). The diffraction intensities were corrected for Lorentz and polarization factors. The structures were solved using SHELXT or SIR2011 programs<sup>[4,5]</sup> and refined by full-matrix least-squares procedure with SHELXL (version 2018/3).<sup>[6]</sup> The multi-scan absorption corrections were applied using Stoe LANA software.<sup>[7]</sup> Geometrical analyses were performed with SHELXL. The structures were drawn with OLEX2.<sup>[8]</sup> The absolute structure all compounds has been determined by Flack parameter using Parsons method, and by Hooft parameter.<sup>[9,10]</sup>

**Crystal Data** for C<sub>9</sub>H<sub>11</sub>NO<sub>4</sub> (**16a**) ( $M = 197.19$  g/mol): orthorhombic, space group  $P2_12_12_1$  (no. 19),  $a = 7.2347(2)$  Å,  $b = 12.4282(2)$  Å,  $c = 20.6075(3)$  Å,  $V = 1852.91(7)$  Å<sup>3</sup>,  $Z = 8$ ,  $T = 100$  K,  $\mu(\text{CuK}\alpha) = 0.952$  mm<sup>-1</sup>,  $D_{\text{calc}} = 1.414$  g/cm<sup>3</sup>, 64018 reflections measured ( $8.308^\circ \leq 2\theta \leq 146.83^\circ$ ), 3678 unique ( $R_{\text{int}} = 0.0222$ ,  $R_{\text{sigma}} = 0.0061$ ) which were used in all calculations. The final  $R_1$  was 0.0265 ( $I > 2\sigma(I)$ ) and  $wR_2$  was 0.0718 (all data). The Flack parameter  $x = 0.00(5)$ . The Hooft parameter  $y = 0.005(9)$ .

**Crystal Data** for C<sub>8</sub>H<sub>9</sub>NO<sub>4</sub> (**20**) ( $M = 183.16$  g/mol): monoclinic, space group  $P2_1$  (no. 4),  $a = 9.5701(1)$  Å,  $b = 7.7138(2)$  Å,  $c = 11.0161(2)$  Å,  $\beta = 90.420(1)^\circ$ ,  $V = 813.21(3)$  Å<sup>3</sup>,  $Z = 4$ ,  $T = 100$  K,  $\mu(\text{CuK}\alpha) = 1.040$  mm<sup>-1</sup>,  $D_{\text{calc}} = 1.496$  g/cm<sup>3</sup>, 38003 reflections measured ( $8.026^\circ \leq 2\theta \leq 143.004^\circ$ ), 3103 unique ( $R_{\text{int}} = 0.0168$ ,  $R_{\text{sigma}} = 0.0071$ ) which were used in all calculations. The final  $R_1$  was 0.0223 ( $I > 2.0\sigma(I)$ ) and  $wR_2$  was 0.0579 (all data). The Flack parameter  $x = 0.01(4)$ . The Hooft parameter  $y = 0.005(18)$ .

**Crystal Data** for C<sub>8</sub>H<sub>9</sub>NO<sub>4</sub> (**21**) ( $M = 378.54$  g/mol): monoclinic, space group  $P2_1$  (no. 4),  $a = 9.5249(1)$  Å,  $b = 9.1755(1)$  Å,  $c = 24.7518(3)$  Å,  $\beta = 95.845(1)^\circ$ ,  $V = 2151.95(4)$  Å<sup>3</sup>,  $Z = 4$ ,  $T = 100$  K,  $\mu(\text{CuK}\alpha) = 0.606$  mm<sup>-1</sup>,  $D_{\text{calc}} = 1.168$  g/cm<sup>3</sup>, 68366 reflections measured ( $7.18^\circ \leq 2\theta \leq 143.642^\circ$ ), 7376 unique ( $R_{\text{int}} = 0.0155$ ,  $R_{\text{sigma}} = 0.0072$ ) which were used in all calculations. The final  $R_1$  was 0.0282 ( $I > 2.0\sigma(I)$ ) and  $wR_2$  was 0.0806 (all data). The Flack parameter  $x = 0.00(9)$ . The Hooft parameter  $y = 0.04(2)$ .

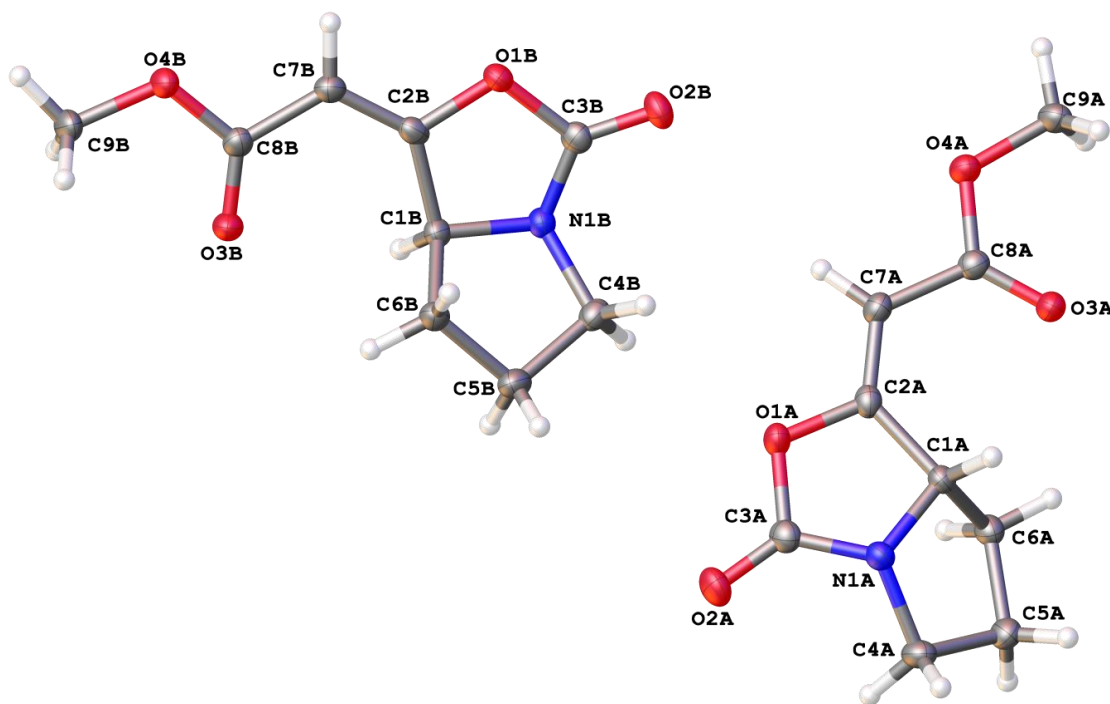

**Fig. X1** Molecular structure of **16a** with the thermal ellipsoids shown at a 50% probability level.

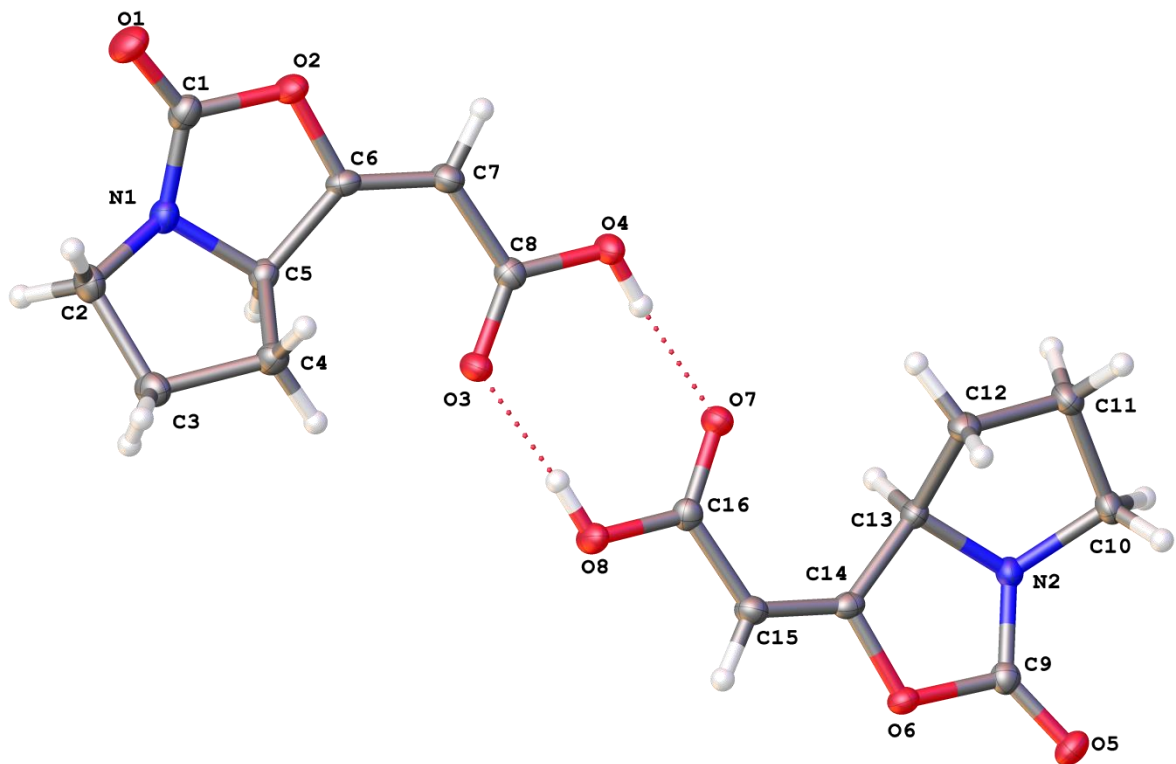

**Fig. X2** Molecular structure of **20** with the thermal ellipsoids shown at a 50% probability level.

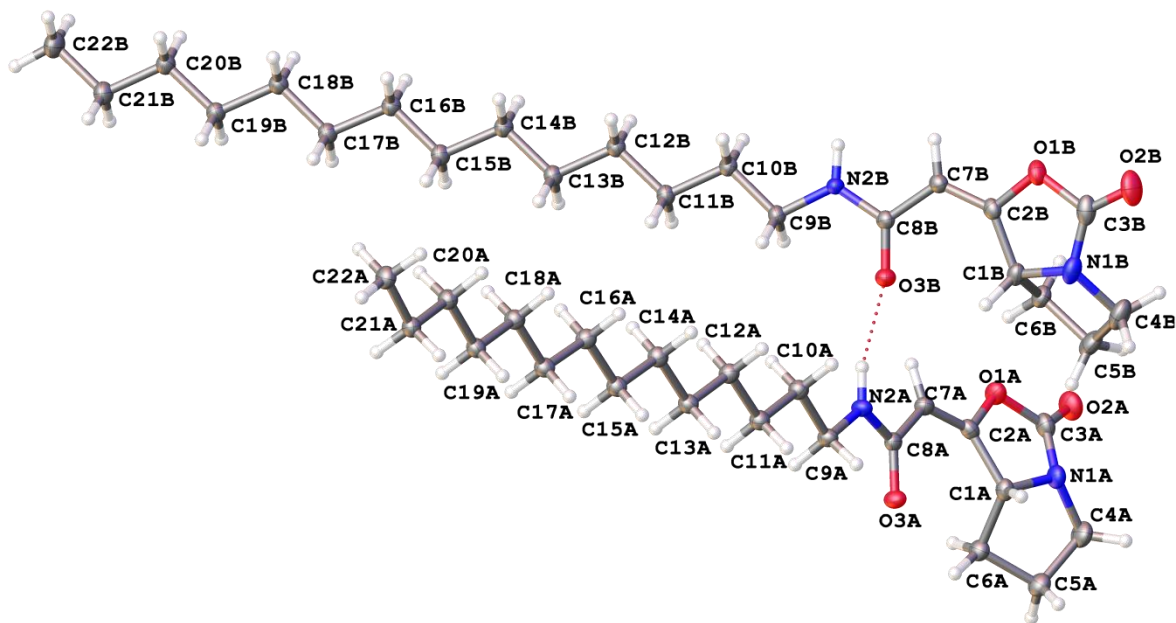

**Fig. X3** Molecular structure of **21** with the thermal ellipsoids shown at a 50% probability level.

## References and Notes:

- (1) Dockerty, P.; Edens, J. G.; Tol, M. B.; Morales Angeles, D.; Domenech, A.; Liu, Y.; Hirsch, A. K. H.; Veening, J.-W.; Scheffers, D.-J.; Witte, M. D. *Org. Biomol. Chem.* **2017**, *15*, 894.
- (2) Dichloromethane was used to furnish pure *E* isomer **19a**, then the eluent was changed to more polar mixture of CH<sub>2</sub>Cl<sub>2</sub>/EtOAc to furnish minor *Z* isomer **19b**.
- (3) Dichloromethane was used to furnish impurities, then the eluent was changed to more polar mixture of CH<sub>2</sub>Cl<sub>2</sub>/MeOH/AcOH to furnish acid **20**.
- (4) Sheldrick, G. M. *Acta Crystallogr., Sect. A* **2015**, *A71*, 3.
- (5) Burla, M. C.; Camalli, R.; Camalli, M.; Carrozzini, B.; Cascarano, G. L.; Giacovazzo, C.; Mallamo, M.; Mazzone, A.; Polidori, G.; Spagna, R. *J. Appl. Crystallogr.* **2012**, *45*, 351.
- (6) Sheldrick, G. M. *Acta Crystallogr., Sect. C* **2015**, *C71*, 3.
- (7) Koziskova, J.; Hahn, F.; Richter, J.; Kozisek, J. *Acta Chim. Slovaca* **2016**, *9*, 136.
- (8) Dolomanov, O. V.; Bourhis, L. J.; Gildea, R. J.; Howard, J. A. K.; Puschmann, H. *J. Appl. Crystallogr.* **2009**, *42*, 339.
- (9) Parsons, S.; Flack, H. D.; Wagner, T. *Acta Crystallogr., Sect. B* **2013**, *B69*, 249.
- (10) Hooft, R. W. W.; Straver, L. H.; Spek, A. L. *J. Appl. Crystallogr.* **2008**, *41*, 96.
